# Supplementary material for: A global database of dissolved organic matter (DOM) measurements in coastal waters (CoastDOM v1)
Source: Copernicus journal article supplement (doi:10.5194/essd-2023-348), 2023-09-27
Supplement: Supplementary file [file essd-2023-348-AC3-supplement.pdf]

1 **A global database of dissolved organic matter (DOM) concentration**  
2 **measurements in coastal waters (CoastDOM v1)**

3 Christian Lønborg<sup>1\*</sup>, Cátia Carreira<sup>2</sup>, Gwenaël Abril<sup>3</sup>, Susana Agustí<sup>4</sup>, Valentina Amaral<sup>5</sup>,  
4 Agneta Andersson<sup>6</sup>, Javier Arístegui<sup>7</sup>, Punyasloke Bhadury<sup>8</sup>, Mariana B. Bif<sup>9</sup>, Alberto V.  
5 Borges<sup>10</sup>, Steven Bouillon<sup>11</sup>, Maria Ll. Calleja<sup>4,12</sup>, Luiz C. Cotovicz Jr<sup>13,49</sup>, Stefano Cozzi<sup>14</sup>,  
6 Maryló Doval<sup>15</sup>, Carlos M. Duarte<sup>4</sup>, Bradley Eyre<sup>16</sup>, Cédric G. Fichot<sup>17</sup>, E. Elena García-  
7 Martín<sup>18</sup>, Alexandra Garzon-Garcia<sup>19</sup>, Michele Giani<sup>20,21</sup>, Rafael Gonçalves-Araujo<sup>22</sup>,  
8 Renee Gruber<sup>23</sup>, Dennis A. Hansell<sup>24</sup>, Fuminori Hashihama<sup>25</sup>, Ding He<sup>26</sup>, Johnna M.  
9 Holding<sup>27</sup>, William R. Hunter<sup>28</sup>, J. Severino P. Ibánhez<sup>29</sup>, Valeria Ibello<sup>30</sup>, Shan Jiang<sup>31</sup>,  
10 Guebuem Kim<sup>32</sup>, Katja Klun<sup>33</sup>, Piotr Kowalczyk<sup>34</sup>, Atsushi Kubo<sup>35</sup>, Choon Weng Lee<sup>36</sup>,  
11 Cláudia B. Lopes<sup>37</sup>, Federica Maggioni<sup>38</sup>, Paolo Magni<sup>39</sup>, Celia Marrase<sup>40</sup>, Patrick  
12 Martin<sup>41</sup>, S. Leigh McCallister<sup>42</sup>, Roisin McCallum<sup>43</sup>, Patricia M. Medeiros<sup>44</sup>, Xosé Anxelu  
13 G. Morán<sup>4,45</sup>, Frank E. Muller-Karger<sup>46</sup>, Allison Myers-Pigg<sup>47</sup>, Marit Norli<sup>48</sup>, Joanne M.  
14 Oakes<sup>15</sup>, Helena Osterholz<sup>49</sup>, Hyekyung Park<sup>32</sup>, Maria Lund Paulsen<sup>50</sup>, Judith A.  
15 Rosentreter<sup>16,51</sup>, Jeff D. Ross<sup>52</sup>, Digna Rueda-Roa<sup>46</sup>, Chiara Santinelli<sup>53</sup>, Yuan Shen<sup>54</sup>,  
16 Eva Teira<sup>55</sup>, Tinkara Tinta<sup>33</sup>, Guenther Uher<sup>56</sup>, Masahide Wakita<sup>57</sup>, Nicholas Ward<sup>47</sup>,  
17 Kenta Watanabe<sup>58</sup>, Yu Xin<sup>59</sup>, Youhei Yamashita<sup>60</sup>, Liyang Yang<sup>61</sup>, Jacob Yeo<sup>16</sup>, Huamao  
18 Yuan<sup>62</sup>, Qiang Zheng<sup>54,63</sup>, Xosé Antón Álvarez-Salgado<sup>29</sup>

19 <sup>1</sup>Section for Marine Diversity and Experimental Ecology, Department of Ecoscience,  
20 Aarhus University, 4000 Roskilde, Denmark.

21 <sup>2</sup>Department of Environmental Science, Aarhus University, 4000 Roskilde, Denmark.

22 <sup>3</sup>Laboratoire de Biologie des Organismes et Ecosystèmes Aquatiques (BOREA), CNRS,  
23 Muséum National d'Histoire Naturelle, 61 rue Buffon, 75005, Paris, France.

24 <sup>4</sup>King Abdullah University of Science and Technology, Thuwal 23955-6900, Kingdom of  
25 Saudi Arabia.

26 <sup>5</sup>Departamento Interdisciplinario de Sistemas Costero Marinos, Centro Universitario  
27 Regional Este, Universidad de la República, Ruta 9 y 15, CP 27000, Rocha, Uruguay.  
28 <sup>6</sup>Umeå Marine Sciences Centre, Umeå University, Sweden.  
29 <sup>7</sup>Instituto de Oceanografía y Cambio Global (IOCAG), Universidad de Las Palmas de  
30 Gran Canaria, Las Palmas, Spain.  
31 <sup>8</sup>Centre for Climate and Environmental Studies, Indian Institute of Science Education  
32 and Research Kolkata, Mohanpur, Nadia, West Bengal, India.  
33 <sup>9</sup>Monterey Bay Aquarium Research Institute, Moss Landing, California, United States.  
34 <sup>10</sup>University of Liège, Chemical Oceanography Unit, Liège, Belgium.  
35 <sup>11</sup>KU Leuven, Department of Earth and Environmental Sciences, Leuven, Belgium.  
36 <sup>12</sup>Marine Ecology and Systematics (MarES), Department of Biology, Universitat de les  
37 Illes Balears, 07122 Palma de Mallorca, Spain.  
38 <sup>13</sup>Departamento de Geoquímica, Universidade Federal Fluminense, Outeiro São João  
39 Batista s/n, 24020015 Niterói, RJ, Brazil.  
40 <sup>14</sup>Consiglio Nazionale delle Ricerche, Istituto di Scienze Marine (CNR-ISMAR), Strada  
41 Statale 14, km 163.5, 34149 Trieste, Italy.  
42 <sup>15</sup>Instituto Tecnológico para o Control do Medio Mariño de Galicia, 36611 Vilagarcía de  
43 Arousa, Spain.  
44 <sup>16</sup>Centre for Coastal Biogeochemistry, Faculty of Science and Engineering, Southern  
45 Cross University, Lismore 2480, NSW, Australia.  
46 <sup>17</sup>Department of Earth and Environment, Boston University, Boston, MA, United States.  
47 <sup>18</sup>National Oceanography Centre, European Way, Southampton, SO14 3ZH, United  
48 Kingdom.  
49 <sup>19</sup>Department of Environment and Science, PO Box 5078, Brisbane, Queensland 4001,  
50 Australia.  
51 <sup>20</sup>National Institute of Oceanography and Applied Geophysics (OGS), Trieste, Italy.

52 <sup>21</sup>Istituto Centrale per la Ricerca scientifica e tecnologia Applicata al MAre, Chioggia,  
53 Italy

54 <sup>22</sup>National Institute of Aquatic Resources, Technical University of Denmark, Kgs.  
55 Lyngby, Denmark.

56 <sup>23</sup>Australian Institute of Marine Science, PMB 3, Townsville QLD 4810, Australia.

57 <sup>24</sup>Department of Ocean Sciences, Rosenstiel School of Marine and Atmospheric  
58 Science, University of Miami, Miami, FL, United States.

59 <sup>25</sup>Tokyo University of Marine Science and Technology, Japan.

60 <sup>26</sup>Department of Ocean Science and Center for Ocean Research in Hong Kong and  
61 Macau, The Hong Kong University of Science and Technology, Clear Water Bay, Hong  
62 Kong, China.

63 <sup>27</sup>Department of Ecoscience, Aarhus University, 8000 Aarhus, Denmark.

64 <sup>28</sup>Fisheries and Aquatic Ecosystems Branch, Agri-Food and Biosciences Institute,  
65 Belfast, Northern Ireland, United Kingdom.

66 <sup>29</sup>CSIC, Instituto de Investigaci3n Mariñas, Eduardo Cabello 6, 36208 Vigo, Spain.

67 <sup>30</sup>Institute of Marine Sciences, Middle East Technical University, 33731 Erdemli-Mersin,  
68 Turkey.

69 <sup>31</sup>State Key Laboratory of Estuarine and Coastal Research, East China Normal  
70 University, 200241, Shanghai, China.

71 <sup>32</sup>School of Earth and Environmental Sciences, Seoul National University, Seoul 08826,  
72 Korea.

73 <sup>33</sup>Marine Biology Station, National Institute of Biology, Fornače 41, 6330 Piran,  
74 Slovenia.

75 <sup>34</sup>Remote Sensing Laboratory, Institute of Oceanology, Polish Academy of Sciences,  
76 Sopot, Poland.

77 <sup>35</sup>Department of Geosciences, Shizuoka University, 836 Ohya, Suruga-ku, Shizuoka,  
78 422-8529, Japan.

79 <sup>36</sup>Laboratory of Microbial Ecology, Institute of Biological Sciences, Institute of Ocean  
80 and Earth Sciences, Universiti Malaya, 50603 Kuala Lumpur, Malaysia.

81 <sup>37</sup>CICECO – Aveiro Institute of Materials, Department of Chemistry, University of Aveiro,  
82 Campus de Santiago, 3810-193 Aveiro, Portugal.

83 <sup>38</sup>University of New Caledonia and Institute de recherche pour le developement (IRD),  
84 New Caledonia.

85 <sup>39</sup>Consiglio Nazionale delle Ricerche, Istituto per lo studio degli impatti Antropici e  
86 Sostenibilità in ambiente marino (CNR-IAS), Loc. Sa Mardini, Torregrande, 09170,  
87 Oristano, Italy.

88 <sup>40</sup>Institut de Ciències del Mar (CSIC), Passeig Marítim de la Barceloneta, 37  
89 08003 Barcelona, Spain.

90 <sup>41</sup>Asian School of the Environment, Nanyang Technological University, 639798,  
91 Singapore.

92 <sup>42</sup>Virginia Commonwealth University, Department of Biology, Richmond, Virginia, United  
93 States.

94 <sup>43</sup>Centre for Marine Ecosystems Research, School of Science, Edith Cowan University,  
95 270 Joondalup Drive, Joondalup 6027 WA, Australia.

96 <sup>44</sup>Department of Marine Sciences, University of Georgia, Athens, Georgia, United  
97 States.

98 <sup>45</sup>Centro Oceanográfico de Gijón/Xixón, Instituto Español de Oceanografía, Gijón/Xixón,  
99 Spain.

100 <sup>46</sup>College of Marine Science, University of South Florida, Saint Petersburg, Florida  
101 33701, United States.

102 <sup>47</sup>Pacific Northwest National Laboratory, Marine and Coastal Research Laboratory,  
103 Sequim, Washington, United States.

104 <sup>48</sup>Norwegian Institute for Water Research, Oslo, Norway.

105 <sup>49</sup>Leibniz Institute for Baltic Sea Research Warnemünde, D-18119 Rostock-  
106 Warnemünde, Germany.

107 <sup>50</sup>Marine microbiology, University of Bergen, Norway.

108 <sup>51</sup>Yale School of the Environment, Yale University, New Haven, Connecticut, United  
109 States.

110 <sup>52</sup>Institute for Marine and Antarctic Studies, University of Tasmania, Private Bag 49,  
111 Hobart, Tasmania 7001, Australia

112 <sup>53</sup>Biophysics Institute, CNR, Pisa, Italy.

113 <sup>54</sup>State Key Laboratory of Marine Environmental Science (MEL) & College of Ocean  
114 and Earth Sciences, Xiamen University, China.

115 <sup>55</sup>Departamento de Ecología y Biología Animal, Universidade de Vigo, Centro de  
116 Investigación Mariña da Universidade de Vigo (CIM-UVigo), Vigo, Spain.

117 <sup>56</sup>School of Natural and Environmental Science, Newcastle University, Newcastle upon  
118 Tyne, United Kingdom.

119 <sup>57</sup>Mutsu Institute for Oceanography, Research Institute for Global Change, Japan  
120 Agency for Marine-Earth Science and Technology, 690 Kitasekine, Sekine, Mutsu,  
121 Aomori, Japan.

122 <sup>58</sup>Coastal and Estuarine Environment Research Group, Port and Airport Research  
123 Institute, Yokosuka 239-0826, Japan.

124 <sup>59</sup>Key Laboratory of Marine Chemistry Theory and Technology, Ministry of Education,  
125 Institute for Advanced Ocean Study, Ocean University of China, Qingdao, Shandong,  
126 China.

127 <sup>60</sup>Faculty of Environmental Earth Science, Hokkaido University, Hokkaido 060-0810,  
128 Japan.

129 <sup>61</sup>College of Environment and Safety Engineering, Fuzhou University, China.

130 <sup>62</sup>Key Laboratory of Marine Ecology and Environmental Sciences, Institute of  
131 Oceanology, Chinese Academy of Sciences, Qingdao, China.

132 <sup>63</sup>Fujian Key Laboratory of Marine Carbon Sequestration, Xiamen University, Xiamen  
133 361102, China.

134

135 \*Corresponding author:

136 E-mail: [c.lonborg@ecos.au.dk](mailto:c.lonborg@ecos.au.dk) or [clonborg@gmail.com](mailto:clonborg@gmail.com)

137

138 **ORCID nr.:**

139 Christian Lønborg: 0000-0001-8380-0238

140 Cátia Carreira: 0000-0002-1520-9320

141 Gwenaël Abril: 0000-0002-4914-086X

142 Susana Agustí: 0000-0003-0536-7293

143 Valentina Amaral: 0000-0002-1088-1484

144 Agneta Andersson: 0000-0001-7819-9038

145 Javier Arístegui: 0000-0002-7526-7741

146 Punyasloke Bhadury: 0000-0001-8714-7475

147 Mariana Bernardi Bif: 0000-0002-2148-4556

148 Alberto V. Borges: 0000-0002-5434-2247

149 Steven Bouillon: 0000-0001-7669-2929

150 Maria Ll. Calleja: 0000-0002-5992-2013

151 Luiz C. Cotovicz Jr: 0000-0002-3914-8155

152 Stefano Cozzi: 0000-0003-0116-742X

153 Maryló Doval: 0000-0002-8565-8703

154 Carlos M. Duarte: 0000-0002-1213-1361

155 Bradley Eyre: 0000-0001-5502-0680

156 Cédric G. Fichot: 0000-0002-1099-5764

157 E. Elena García-Martín: 0000-0003-4807-3287

158 Alexandra Garzon-Garcia: 0000-0002-6804-8890

159 Michele Giani: 0000-0002-3306-7725

160 Rafael Gonçalves-Araujo: 0000-0001-8344-8326

161 Renee Gruber: 0000-0002-8788-6910

162 Dennis A. Hansell: 0000-0001-9275-3445

163 Fuminori Hashihama: 0000-0003-3835-7681

164 Ding He: 0000-0001-9620-6115

165 Johnna M. Holding: 0000-0002-7364-0055

166 William R. Hunter: 0000-0001-8801-7947

167 J. Severino P. Ibánhez: 0000-0001-6093-3054  
168 Valeria Ibello: 0000-0002-1067-0425  
169 Shan Jiang: 0000-0002-1121-6080  
170 Guebuem Kim: 0000-0002-5119-0241  
171 Katja Klun: 0000-0001-6111-1650  
172 Piotr Kowalczyk: 0000-0001-6016-0610  
173 Atsushi Kubo: 0000-0002-6457-5386  
174 Choon Weng Lee: 0000-0001-9805-9980  
175 Cláudia Lopes: 0000-0001-7378-8677  
176 Federica Maggioni: 0000-0002-7109-4257  
177 Paolo Magni: 0000-0001-5955-6829  
178 Celia Marrase: 0000-0002-5097-4829  
179 Patrick Martin: 0000-0001-8008-5558  
180 S. Leigh McCallister: 0000-0002-9041  
181 Roisin McCallum: 0000-0002-0358-2371  
182 Patricia M. Medeiros: 0000-0001-6818-2603  
183 Xosé Anxelu G. Morán: 0000-002-9823-5339  
184 Frank Muller-Karger: 0000-0003-3159-5011  
185 Allison Myers-Pigg: 0000-0002-6905-6841  
186 Marit Norli: 0000-0001-7472-1562  
187 Joanne M. Oakes: 0000-0002-9287-2652  
188 Helena Osterholz: 0000-0002-2858-9799  
189 Hyekyung Park: 0000-0002-4743-5883  
190 Maria Lund Paulsen: 0000-0002-1474-7258  
191 Jeff D. Ross: 0000-0002-8659-3833  
192 Judith A. Rosentreter: 0000-0001-5787-5682  
193 Digna Rueda-Roa: 000-0003-4621-009X  
194 Chiara Santinelli: 0000-0002-8921-275X  
195 Yuan Shen: 0000-0001-6618-4226  
196 Eva Teira: 0000-0002-4333-0101  
197 Tinkara Tinta: 0000-0001-6740-8973  
198 Guenther Uher: 0000-0001-5105-4445  
199 Masahide Wakita: 0000-0002-3333-0546  
200 Nicholas Ward: 0000-0001-6174-5581  
201 Kenta Watanabe: 0000-0002-0106-3623  
202 Yu Xin: 0000-0002-5328-7717  
203 Youhei Yamashita: 0000-0002-9415-8743  
204 Liyang Yang: 0000-0001-8767-8698  
205 Jacob Yeo: 0000-0003-2443-5378  
206 Huamao Yuan: 0000-0003-2014-619X  
207 Qiang Zheng: 0000-0002-6836-2310  
208 Xosé Antón Álvarez-Salgado: 0000-0002-2387-9201

209 **Abstract**

210 Measurements of dissolved organic carbon (DOC), nitrogen (DON), and phosphorus  
211 (DOP) concentrations are used to characterize the dissolved organic matter (DOM) pool  
212 and are important components of biogeochemical cycling in the coastal ocean. Here, we  
213 present the first edition of a global database (CoastDOM v1; available at  
214 <https://doi.pangaea.de/10.1594/PANGAEA.964012>) compiling previously published and  
215 unpublished measurements of DOC, DON, and DOP in coastal waters. These data are  
216 complemented by hydrographic data such as temperature and salinity and, to the extent  
217 possible, other biogeochemical variables (e.g., Chlorophyll-a, inorganic nutrients) and the  
218 inorganic carbon system (e.g., dissolved inorganic carbon and total alkalinity). Overall,  
219 CoastDOM v1 includes observations of concentrations from all continents. However,  
220 most data were collected in the Northern Hemisphere, with a clear gap in coastal water  
221 DOM measurements from the Southern Hemisphere. The data included were collected  
222 from 1978 to 2022 and consist of 62339 data points for DOC, 20360 for DON, and 13440  
223 for DOP. The number of measurements decreases progressively in the sequence DOC  
224 > DON > DOP, reflecting both differences in the maturity of the analytical methods and  
225 the greater focus on carbon cycling by the aquatic science community. The global  
226 database shows that the average DOC concentration in coastal waters (average  $\pm$   
227 standard deviation (SD):  $182 \pm 314 \mu\text{mol C L}^{-1}$ ; median:  $103 \mu\text{mol C L}^{-1}$ ) is 13-fold higher  
228 than the average coastal DON concentration (average  $\pm$  SD:  $13.6 \pm 30.4 \mu\text{mol N L}^{-1}$ ;  
229 median:  $8.0 \mu\text{mol N L}^{-1}$ ), which is itself 39-fold higher than the average coastal DOP  
230 concentration (average  $\pm$  SD:  $0.34 \pm 1.11 \mu\text{mol P L}^{-1}$ ; median:  $0.18 \mu\text{mol P L}^{-1}$ ). This  
231 dataset will be useful for identifying global spatial and temporal patterns in DOM and help  
232 facilitate the reuse of DOC, DON, and DOP data in studies aimed at better characterizing  
233 local biogeochemical processes, closing nutrient budgets, estimating carbon, nitrogen,



234 and phosphorous pools, as well as establishing a baseline for modelling future changes  
235 in coastal waters.

236

237 **Keywords:** Dissolved organic matter, Dissolved organic carbon, Dissolved organic  
238 nitrogen, Dissolved organic phosphorus, Coastal waters, Global database.

## 239 1. Introduction

240 Coastal waters are the most biogeochemical dynamic areas of the ocean, exhibiting  
241 the highest standing stocks, process rates and transport fluxes of carbon (C), nitrogen  
242 (N), and phosphorus (P) per unit area (Bauer et al., 2013; Mackenzie et al., 2011). In  
243 these areas, organic matter plays a critical role in numerous biogeochemical processes,  
244 serving as both a C, N, and P reservoir and substrate (Carreira et al., 2021).

245 Organic material found in the marine environment is commonly distinguished by its  
246 size; material retained on a filter with a pore size typically between 0.2 and 0.7  $\mu\text{m}$  is  
247 classified as particulate organic matter (POM), whereas organic matter that passes  
248 through the filter is referred to as dissolved organic matter (DOM). This partitioning is  
249 operational but has implications for biogeochemical cycling: POM can be suspended in  
250 the water column or sink to the sediments controlled by its size, shape and density  
251 (Laurenceau-Cornec et al., 2015), whereas DOM is a solute that mostly remains in the  
252 water column. In most coastal waters, DOM concentrations are higher than POM, with  
253 POM having a larger proportion of known biochemical classes (e.g., carbohydrates,  
254 proteins) than the dissolved fraction, suggesting that generally, DOM is more reworked  
255 and recalcitrant (Boudreau and Ruddick, 1991; Lønborg et al., 2018; Benner and Amon,  
256 2015).

257 The DOM pool consists mainly of C (DOC), N (DON), and P (DOP) but it also includes  
258 other elements such as oxygen, sulphur and trace elements (Lønborg et al., 2020). In  
259 coastal waters, DOM originates from multiple sources. Internal, or autochthonous,  
260 sources include planktonic organisms (Lønborg et al., 2009; Carlson and Hansell, 2015),  
261 benthic microalgae, macrophytes, and sediment porewater (Burdige and Komada, 2014;  
262 Wada et al., 2008). On the other hand, DOM from external, or allochthonous, sources,  
263 has mainly terrestrial origins, including wetlands, river and surface runoff, groundwater  
264 discharges, and atmospheric deposition (Lavorivska et al., 2016; Raymond and Spencer,

265 2015; Taniguchi et al., 2019; Santos et al., 2021). The main sinks for DOM from the water  
266 column in coastal waters are: 1) bubble coagulation and abiotic flocculation (Kerner et al.,  
267 2003) or sorption to particles (Chin et al., 1998); 2) sunlight-mediated photodegradation  
268 (Mopper et al., 2015); and 3) microbial degradation by mainly heterotrophic prokaryotes  
269 (Lønborg and Álvarez-Salgado, 2012).

270 Given the importance of DOM as a source of nutrients and for coastal biogeochemical  
271 cycling in general, numerous studies have measured the C, N and P content of the DOM  
272 pool over the last few decades (e.g.,(García-Martín et al., 2021; Cauwet, 2002; Osterholz  
273 et al., 2021). Most data, however, are often unavailable or stored in an inaccessible  
274 manner, making it difficult to e.g., analyse global spatial and temporal patterns effectively.  
275 Global open ocean DOM data compilation for DOC total dissolved nitrogen (TDN)  
276 (Hansell et al., 2021) and DOP (Liang et al., 2022; Karl and Björkman, 2015) already exist  
277 and contains few coastal samples (< 200m) (Hansell et al., 2021), but there are no  
278 compilation specifically focused on coastal waters. Hence, there is a clear need for a  
279 comprehensive global and integrated database of DOC, DON and DOP measurements  
280 for coastal waters. To address this need, we have prepared the first edition of a coastal  
281 DOM database (named CoastDOM v1), by compiling both previously reported as well as  
282 unpublished data. These data have been obtained from authors of the original studies or  
283 extracted directly from the original studies. In order to allow the DOM measurements to  
284 be interpreted across larger scales, and to better understand their relationship with local  
285 environmental conditions, we have included concurrently collected ancillary data (such  
286 as physical and/or chemical seawater properties) whenever available. The objective of  
287 this database is multifaceted. Firstly, we aimed to compile all available coastal DOM data  
288 into a single repository. Secondly, our intention was to make these data easily accessible  
289 to the research community and thirdly, we sought to achieve long-term consistency of the

290 measurements, to enable data intercomparison and establish a robust baseline for  
291 assessing, for example, the impacts of climate change and land use changes.

## 292 **2. Methods**

### 293 **2.1. Data compilation**

294 The measurements included in CoastDOM v1 were obtained either directly from  
295 authors of previously published studies, online databases, or scientific papers. An  
296 extensive search of published reports, Ph.D. theses, and peer-reviewed literature was  
297 performed to identify studies dealing with DOM in coastal waters. First, a formal search  
298 was performed using Google Scholar in January 2022 using the search terms “dissolved  
299 organic carbon”, “dissolved organic nitrogen”, and “dissolved organic phosphorus” in  
300 connection with “marine” or “ocean”, which yielded a total of 897 articles (after filtering  
301 the query by searching content in the title and abstract and excluding non-coastal  
302 articles). When data could not be obtained directly from the corresponding authors,  
303 relevant data were extracted. Further searches for relevant datasets were conducted  
304 using the reference lists of the identified scientific papers as well as databases and  
305 repositories to capture as many datasets as possible. Additionally, research groups that  
306 were invited to participate in this effort were also encouraged to submit unpublished data  
307 to CoastDOM v1.

308

### 309 **2.2. Dissolved organic matter analysis**

310 The DOC concentrations included in CoastDOM v1 were commonly measured using a  
311 total organic carbon (TOC) hightemperature catalytic oxidation (HTCO) analyser (81% of  
312 samples (Sharp et al., 1993). Some were measured by a combined wet chemical  
313 oxidation (WCO) step and/or UV digestion, after which the carbon dioxide generated was  
314 quantified (19% of samples). Similarly, concentrations of total dissolved nitrogen (TDN;

315 Sipler and Bronk, 2015) were determined using either a nitric oxide chemiluminescence  
316 detector connected in series with the HTOCO analyser used for DOC analyses (31% of the  
317 samples), or by employing a UV and/or chemical oxidation step (69%). In the latter  
318 approach, both organic and inorganic N compounds were oxidised to nitrate, which was  
319 subsequently quantified through a colorimetric method to determine the concentration of  
320 inorganic N (Valderrama, 1981; Álvarez-Salgado et al., 2023; Halewood et al., 2022;  
321 Foreman et al., 2019). Another method used for DON determination is oxidizing the  
322 sample and measuring the resulting total nitrate by the nitric oxide chemiluminescence  
323 method (Knapp et al., 2005). However, none of the concentration measurements included  
324 in CoastDOM v1 applied this method. The reported DON concentrations were calculated  
325 as the difference between TDN and dissolved inorganic nitrogen (DIN: sum of ammonium  
326 ( $\text{NH}_4^+$ ) and nitrate/nitrite ( $\text{NO}_3^- + \text{NO}_2^-$ );  $\text{DON} = \text{TDN} - \text{DIN}$ ) (Álvarez-Salgado et al., 2023).  
327 Analyses of total dissolved phosphorus (TDP) were determined by UV (4%) or wet  
328 chemical oxidation (66%), or a combination of these (30%), and subsequently were  
329 analysed for inorganic phosphorus by a colorimetric method (Álvarez-Salgado et al.,  
330 2023). Another method also previously used for TDP analysis is the ash/hydrolysis  
331 method (Solorzano and Sharp, 1980), even though none of the data included in  
332 CoastDOM v1 used this method. The DOP concentrations were calculated as the  
333 difference between TDP and soluble reactive phosphorus (SRP:  $\text{HPO}_4^{2-}$ ) ( $\text{DOP} = \text{TDP} -$   
334  $\text{SRP}$ ) (Álvarez-Salgado et al., 2023).

335

### 336 **3. Description of the dataset**

337 The data compiled in CoastDOM v1 were collected, analysed and processed by different  
338 laboratories, however, all data included have undergone quality control measures, either  
339 by using reference samples or internal quality assurance procedures. While many of the  
340 included DOC and TDN data have been systematically compared against consensus

341 reference material (CRM) mainly provided by the University of Miami's CRM program  
342 (Hansell, 2005), there is a limitation in CoastDOM v1 regarding the intercalibration across  
343 different measurement systems used for both DOP and DON determination. While the  
344 CRM could be used for DOC, DON and DOP measurements, this has not yet been  
345 attempted for DOP and measurement uncertainties increase in the sequence DOC >  
346 DON > DOP. Although some of the reported measurements have quantified the DOP  
347 recovery based on commercially available DOP compounds such as Adenosine  
348 triphosphate (ATP), it is not known if these were conducted systematically in all cases.  
349 Therefore, we strongly recommend undertaking further intercalibration across  
350 laboratories for future measurements of TDP, as has been done for DOC and TDN  
351 measurements (e.g.,(Sharp et al., 2002). Since additional quality control is not possible  
352 in retrospect, we assessed the quality of CoastDOM v1 based on its internal consistency.

353 In CoastDOM v1, we defined "coastal water" as encompassing estuaries (salinity >  
354 0.1) to the continental shelf break (water depth < 200 m). However, some locations, such  
355 as deep fjords which are close to the coast cannot be classed as coastal due to  
356 bathymetry (deeper than > 200 m). Therefore, we evaluated the inclusion of some  
357 datasets on a case-by-case basis. For inclusion in the database, each DOM  
358 measurement needed at a minimum to contain the following information (if reported in the  
359 original publication or otherwise available):

360

- 361 - Country where samples were collected
- 362 - Latitude of measurement (in decimal units)
- 363 - Longitude of measurement (in decimal units)
- 364 - Year of sampling
- 365 - Month of sampling
- 366 - Sampling day (when available)

- 367 - Depth (m) at which the discrete samples were collected
- 368 - Temperature (°C) of the sample
- 369 - Salinity of the sample
- 370 - Dissolved organic carbon (DOC) concentration ( $\mu\text{mol L}^{-1}$ )
- 371 - Method used to measure DOC concentration
- 372 - DOC - QA flag: Quality flag for DOC measurement
- 373 - Dissolved organic nitrogen (DON) concentration ( $\mu\text{mol L}^{-1}$ )
- 374 - Total dissolved nitrogen (TDN) concentration ( $\mu\text{mol L}^{-1}$ )
- 375 - Method used to measure TDN concentration
- 376 - TDN - QA flag: Quality flag for TDN measurement
- 377 - Dissolved organic phosphorus (DOP) concentration ( $\mu\text{mol L}^{-1}$ )
- 378 - Total dissolved phosphorus (TDP) concentration ( $\mu\text{mol L}^{-1}$ )
- 379 - Method used to measure TDP concentration
- 380 - TDP - QA flag: Quality flag for TDP measurement
- 381 - Responsible person
- 382 - Originator institution
- 383 - Contact of data originator
- 384 It should be noted that in all entries, at least DOC, DON or DOP should have been
- 385 measured. In addition, we also included other relevant data, when available, in the
- 386 CoastDOM v1 dataset:
- 387
- 388 - Depth at the station where the sample was collected (Bottom depth, m).
- 389 - Total suspended solids (TSS) concentration ( $\text{mg L}^{-1}$ )
- 390 - Chlorophyll-a (Chl a) concentration ( $\mu\text{g L}^{-1}$ )
- 391 - Chl a - QA flag: Quality flag for chlorophyll-a measurement
- 392 - Sum of nitrate and nitrite ( $\text{NO}_3^- + \text{NO}_2^-$ ) concentration ( $\mu\text{mol L}^{-1}$ )

- 393 -  $\text{NO}_3^- + \text{NO}_2^-$  - QA flag: Quality flag for  $\text{NO}_3^- + \text{NO}_2^-$  measurement
- 394 - Ammonium ( $\text{NH}_4^+$ ) concentration ( $\mu\text{mol L}^{-1}$ )
- 395 -  $\text{NH}_4^+$  - QA flag: Quality flag for  $\text{NH}_4^+$  measurement
- 396 - Soluble reactive phosphorus ( $\text{HPO}_4^{2-}$ ) concentration ( $\mu\text{mol L}^{-1}$ )
- 397 -  $\text{HPO}_4^{2-}$  - QA flag: Quality flag for  $\text{HPO}_4^{2-}$  measurement
- 398 - Particulate organic carbon (POC) concentration ( $\mu\text{mol L}^{-1}$ )
- 399 - Method used to measure POC concentration
- 400 - POC - QA flag: Quality flag for POC measurement
- 401 - Particulate nitrogen (PN) concentration ( $\mu\text{mol L}^{-1}$ )
- 402 - Method used to measure PN concentration
- 403 - PN - QA flag: Quality flag for PN measurement
- 404 - Particulate phosphorus (PP) concentration ( $\mu\text{mol L}^{-1}$ )
- 405 - Method used to measure PP concentration
- 406 - PP - QA flag: Quality flag for PP measurement
- 407 - Dissolved inorganic carbon (DIC) concentration ( $\mu\text{mol kg}^{-1}$ )
- 408 - DIC - QA flag: Quality flag for DIC measurement
- 409 - Total alkalinity (TA) concentration ( $\mu\text{mol kg}^{-1}$ )
- 410 - TA - QA flag: Quality flag for TA measurement

411

412       Quality control of large datasets is crucial to ensure their reliability and usefulness.  
413 Thus, we have not included data that were deemed compromised, such as records that  
414 had not gone through quality control by the data originators. We also accepted a certain  
415 degree of measurement error since multiple groups have been involved in the collection,  
416 analysis, and/or compilation of the information. Some of these errors were corrected (e.g.,  
417 when a value was placed in a wrong column, or clearly inaccurate locations were  
418 reallocated for consistency with the place of study), while others could not be rectified



419 (e.g., values showing clear signs of contamination) and were consequently excluded from  
420 CoastDOM v1 (Fig. 1). It should also be noted that differences in analytical capabilities  
421 between laboratories and individual measurement campaigns likely caused additional  
422 uncertainty. Outliers, arising for example from contamination, were removed from the  
423 dataset. The data were moreover screened for zero values (i.e., concentrations below the  
424 detection limit or absence of data). In cases where concentrations were below the  
425 detection limit, the zero values were replaced with half the value of the limit-of-detection.  
426 Commonly reported detection limits are  $4 \mu\text{mol L}^{-1}$  for DOC,  $0.3 \mu\text{mol L}^{-1}$  for DON and  
427 are  $0.03 \mu\text{mol L}^{-1}$  for DOP.

428 To ensure the inclusion of only high-quality data, we only accepted entries with specific  
429 World Ocean Circulation Experiment (WOCE) quality codes: “2- Acceptable  
430 measurement” and “6- Mean of replicate measurements”. In our quality control  
431 assessments, we carefully avoided overly strict criteria, known as “data grooming”, which  
432 could potentially overlook genuine patterns and changes in the dataset that may be  
433 significant over longer temporal and/or wider spatial scales. Coastal waters are known to  
434 exhibit a wide range of environmental concentrations, influenced by factors such as  
435 seasonality and local anthropogenic activities. Consequently, these data points may  
436 encompass a wide concentration range. However, obtaining consistent long-term  
437 datasets is important to enable data intercomparison and establish a robust baseline.  
438 Such long-term consistency can be achieved by using the CRM standards provided by  
439 the Hansell laboratory for DOC and TDN. Another helpful approach is comparing the  
440 DOM concentrations obtained by different laboratories in the same study area and time  
441 of year.

442

### 443 **3.1 Summary of dissolved organic carbon (DOC) concentration observations**

444 Measurements of DOC concentrations were conducted between 1978 to 2022, with a  
445 total of 62339 individual data points (Table 1). The DOC concentrations ranged from 17  
446 to 30327  $\mu\text{mol C L}^{-1}$  (average  $\pm$  Standard Deviation (SD):  $182 \pm 314 \mu\text{mol C L}^{-1}$ ; median:  
447  $103 \mu\text{mol C L}^{-1}$ ; Table 1). The majority (53%) of the concentrations fell within the range of  
448 60 to 120  $\mu\text{mol C L}^{-1}$  (Fig. 2). A large number of DOC concentration observations (17%)  
449 ranged between 300 and 600  $\mu\text{mol C L}^{-1}$ , which were predominantly collected in eutrophic  
450 and river-influenced coastal waters of the Northern Hemisphere, such as the Baltic Sea  
451 (Fig. 2). It was observed that 75% of the DOC concentrations were higher than 77  $\mu\text{mol}$   
452  $\text{C L}^{-1}$ , while 25% of the measurements surpassed 228  $\mu\text{mol C L}^{-1}$  (Table 1).

453 Coastal environments that experience minimal continental runoff, such as Palmer  
454 Station in Antarctica, typically exhibit low DOC concentrations. On the other hand, coastal  
455 waters heavily influenced by humic-rich terrigenous inputs, such as the Sarawak region  
456 in Malaysia, tended to have high DOC concentrations. In addition, some extremely high  
457 DOC concentrations were measured in the Derwent River in Australia which is impacted  
458 by paper mill effluents. There has been a large increase in the number of DOC  
459 concentration observations after 1992 (Fig. 3), and those measurements were from a  
460 wide range of locations. However, these concentration observations were not evenly  
461 distributed around the globe, with the Southern Hemisphere being under-sampled (10%  
462 of observations), especially in the African, South American and Antarctic continents (Fig.  
463 3, 4).

464

### 465 **3.2. Summary of dissolved organic nitrogen (DON) concentration observations**

466 The DON concentration measurements were collected between 1990 and 2021, with  
467 a total of 20357 data points (Table 1). Concentrations of DON ranged from  $< 0.1$  to 2095.3  
468  $\mu\text{mol N L}^{-1}$  (average  $\pm$  SD:  $13.6 \pm 30.4 \mu\text{mol N L}^{-1}$ ; median:  $8.0 \mu\text{mol N L}^{-1}$ ; Table 1), with  
469 the most common range (42%) for DON concentrations between 4 to 8  $\mu\text{mol N L}^{-1}$  (Fig.

470 2). Overall, 75% of DON concentrations were above  $5.5 \mu\text{mol N L}^{-1}$ , while 25% were  
471 above  $15.8 \mu\text{mol N L}^{-1}$  (Table 1).

472 The lowest DON concentrations were recorded in Young Sound, Greenland, which  
473 receives direct run-off from the Greenland Ice Sheet, whereas the highest concentrations  
474 were detected during a flood event in the Richmond River Estuary, Australia. Since 1995,  
475 there has been a large increase in the number of DON measurements conducted in  
476 coastal waters globally (Fig. 3); however, the majority of those measurements have been  
477 in the Northern Hemisphere (79% of observations), mostly in Europe and the United  
478 States (Figs. 3, 4).

479

### 480 **3.3. Summary of dissolved organic phosphorus (DOP) concentration**

#### 481 **observations**

482 CoastDOM v1 includes a total of 13534 DOP measurements, collected between 1990  
483 and 2021 (Table 1). Overall, DOP concentrations ranged from  $< 0.10$  to  $84.27 \mu\text{mol P L}^{-1}$   
484 <sup>1</sup> (average  $\pm$  SD:  $0.34 \pm 1.11 \mu\text{mol P L}^{-1}$ ; median:  $0.18 \mu\text{mol P L}^{-1}$ ; Table 2). The majority  
485 (74%) of DOP concentrations were below  $0.30 \mu\text{mol P L}^{-1}$  (Fig. 2). Analysis of the DOP  
486 dataset revealed that 75% of the concentrations were above  $0.11 \mu\text{mol P L}^{-1}$ , while 25%  
487 were above  $0.30 \mu\text{mol P L}^{-1}$  (Table 1).

488 The lowest DOP concentrations were measured off the Kimberley Coast in Australia,  
489 while the highest concentrations were found in the Vasse-Wonnerup Estuary in the South  
490 west region of Australia. Similar to DOC and DON, most of the DOP measurements have  
491 been conducted from the 1990s onwards, with a predominant focus in the Northern  
492 Hemisphere (70% of observations), particularly in Europe and the United States (Figs. 3,  
493 4).

494

### 495 **3.4. Summary of dissolved organic matter (DOM) concentration observations**

496 In CoastDOM v1 the number of measurements decreases progressively in the  
497 sequence DOC > DON > DOP (62339, 20357, and 13534, respectively), reflecting both  
498 differences in the maturity of the analytical methods and the greater focus on carbon  
499 cycling by the aquatic science community. In addition, the average DOC concentration in  
500 coastal waters ( $182 \pm 314$   $\mu\text{mol C L}^{-1}$ ), was 13-fold higher than the average coastal DON  
501 concentrations ( $13.6 \pm 30.4$   $\mu\text{mol N L}^{-1}$ ), which was itself 39-fold higher than the average  
502 coastal DOP concentrations ( $0.34 \pm 1.11$   $\mu\text{mol P L}^{-1}$ ) (Table 1). Interestingly the coefficient  
503 of variation (C.V.- dispersion of the data around the mean) increased from DOC (173%)  
504 to DON (224%) and DOP (326%), which is related to the fact that the % contribution of  
505 refractory organic material decreases in the same sequence (Table 1). It should be noted  
506 that CoastDOM v1 only contains 7058 paired measurements of DOC, DON, and DOP,  
507 and therefore only a subset of observations reported all three element pools. The average  
508 C: N: P stoichiometry for these paired DOM measurements was 1171 ( $\pm 4248$ ): 100 ( $\pm$   
509 580): 1 (Table 1), which was very N- and P- depleted compared to the Redfield Ratio  
510 (Redfield et al., 1963). However, the large variations in C:N, C:P and N:P ratios reveals  
511 large variations in the composition of the DOM pool in coastal waters.

512

### 513 **3.5. Potential use of the dataset**

514 The use of the CoastDOM v1 dataset should be accompanied by the citation of this  
515 paper and the inclusion of the correct doi-reference. CoastDOM v1 is available in full open  
516 access on the PANGEA homepage as a \*.csv file. The dataset includes a brief description  
517 of the metadata and methods employed, with emphasis on measurement techniques and  
518 data units. We chose the terminology most familiar to the ocean science community. It is  
519 important to note that all data included in CoastDOM v1, as well as this manuscript, are  
520 considered public domain; as such, a subset of this global dataset is also available in  
521 previous data compilations (e.g.,(Hansell et al., 2021). The list of citations and links

522 referenced in CoastDOM v1 also provide users with information on how these data have  
523 been previously used in publications or databases.

524

### 525 **3.6. Recommendations and conclusions**

526 In CoastDOM v1, we have compiled available coastal DOM data in a single repository,  
527 making it openly and freely available to the research community. This compilation has  
528 established a consistent global dataset, serving as a valuable information source to  
529 investigate a variety of environmental questions and to explore spatial and temporal  
530 trends. We suggest a set of recommendations for the future expansion of this global  
531 dataset. First, our analysis highlights a spatial bias, with a concentration of sampling  
532 efforts and/or data availability predominantly concentrated in the Northern Hemisphere.  
533 The data gap in coastal DOM measurements in the Southern Hemisphere needs to be  
534 addressed to provide a more representative global understanding of the role of DOM in  
535 coastal water biogeochemistry. Additionally, increased sampling efforts especially around  
536 Africa and South America, and island nations are warranted due to the vulnerability of  
537 many coastal areas to climate change and intensifying human activities, which will  
538 undoubtedly impact DOM biogeochemistry. Furthermore, there are comparatively few  
539 data from coastal waters affected by river discharge into the tropics, e.g., the Amazon,  
540 and Indian and Indonesian rivers that together dominate freshwater inputs to the coastal  
541 ocean. Second, there is a need for more comprehensive temporal and spatial datasets to  
542 capture the variability of DOM concentrations in highly dynamic and productive coastal  
543 systems. Focused efforts should be made to resolve these temporal and spatial changes.  
544 Third, only a fraction of data entries report paired DOC, DON and DOP measurements,  
545 we encourage that these be measured and reported together in order to better determine  
546 changes in stoichiometry and composition. Fourth, collecting and reporting ancillary data,  
547 such as temperature, salinity, nutrient measurements, and particulate components, is

548 important to provide context and better understand the underlying processes driving the  
549 observed DOM concentrations. Fifth, studies need to collect a minimum of metadata and  
550 report it in standardized manner. Lastly, we recommend regular inter-calibration  
551 exercises to establish standardised and interoperable methods and data, particularly for  
552 DON and DOP measurements. This will ensure the comparability and reliability of data  
553 across different studies and enhance our understanding of DON and DOP dynamics in  
554 coastal waters.

555 In light of ongoing global environmental changes, the mobilisation and open sharing of  
556 existing data for important biogeochemical variables, such as the DOM pool, are crucial  
557 for establishing baselines and determining global trends and changes in coastal waters.  
558 The aim is to publish an updated version of the database periodically to determine global  
559 trends of DOM levels in coastal waters, and we therefore encourage researchers to  
560 submit new data to the corresponding author. The CoastDOM v1 dataset was developed  
561 according to the FAIR principles regarding Findability, Accessibility, Interoperability and  
562 Reusability of data. Thus, CoastDOM v1 will serve as a reliable open-source information  
563 resource, enabling in-depth analyses and providing quality-controlled input data for large-  
564 scale ecosystem models.

565

#### 566 **4. Data availability**

567 The dataset is available at the PANGAEA database  
568 (<https://doi.pangaea.de/10.1594/PANGAEA.964012>; (Lønborg et al., 2023)). The file can  
569 be downloaded as a \*.csv merged file and is available in full open access.

570

#### 571 **Competing interests**

572 The authors declare no competing interests.

573 **Author Contribution**

574 C.L., C.C., and X.A.A-S started the initiative and finalised the data compilation. All co-  
575 authors contributed data. C.L. wrote the manuscript with input from all co-authors.

576 **Acknowledgement**

577 Qi Chen is acknowledged for his very skilful help with Figure 4.

578 **Funding**

579 During the drafting of the manuscript C.L. received funding from the Independent  
580 Research Fund Denmark Grant No. 1127-00033B. The monitoring data obtained from  
581 Bermuda received funding from the Bermuda Government Department of Environment  
582 and Natural Resources. A subset of the data obtained from UK coastal estuaries received  
583 funding from the Natural Environment Research Council (Grant NE/N018087/1). Data  
584 retrieved from the Palmer LTER data were collected with support from the Office of Polar  
585 Programs, US National Science Foundation. Data obtained from the Great Barrier Reef  
586 Marine Monitoring Program for Inshore Water Quality, which is a partnership between the  
587 Great Barrier Reef Marine Park Authority, the Australian Institute of Marine Science,  
588 James Cook University, and the Cape York Water Partnership. The contribution by P.K.  
589 was supported by DiSeDOM project contract no. UMO-2019/33/B/ST10/01232 funded by  
590 the NCN - National Science Centre, Poland. N.W. and A.M.-P. participated in this  
591 synthesis effort with funding provided by the U.S. Department of Energy funded  
592 COMPASS-FME project; the provided data was collected with funding from the PREMIS  
593 Initiative, conducted under the Laboratory Directed Research and Development Program  
594 at Pacific Northwest National Laboratory. The data obtained from the Levantine Sea (Med  
595 Sea) received funding from the Scientific and Technological Research Council of Türkiye  
596 (TÜBİTAK, 1001 program, Grant 115Y629). The data obtained from Gulf of Trieste

597 (Slovenian waters) were financed by Research Program No. P1-0237 (Slovenian  
598 Research and Innovation Agency). Data obtained from the northern Baltic Sea were  
599 financed by the research program EcoChange (Swedish research council FORMAS). The  
600 contribution by D.H. was supported by National Natural Science Foundation of China  
601 (42222061), and funding support from the Center for Ocean Research in Hong Kong and  
602 Macau (CORE). CORE is a joint research center for ocean research between Laoshan  
603 Laboratory and HKUST. The contribution by Y.S. was supported by National Natural  
604 Science Foundation of China (42106040), the Fundamental Research Funds for the  
605 Central Universities of China (20720210076), and Fujian Provincial Central Guided Local  
606 Science and Technology Development Special Project (Grant No. 2022L3078). The data  
607 provided by LCCJr were supported by the Brazilian National Council of Research and  
608 Development (CNPq-Pve No. 401.726/2012-6) and by the Carlos Chagas Foundation for  
609 Research Support of the State of Rio de Janeiro (FAPERJ; No. E-26202.785/2016). Data  
610 provided by SC were collected in the framework of Italian (PRISMA 1 and 2, ANOCSIA  
611 and VECTOR) and European (OCEANCERTAIN) research projects. Data provided by  
612 MG were collected within the Project "Mucilages in the Adriatic and Tyrrhenian Seas  
613 (MAT) ", coordinated by the Istituto Centrale per la Ricerca Scientifica e Tecnologica  
614 Applicata al Mare and financially supported by the Italian Ministry of the Environment.  
615 Data obtained from the Georgia coast (USA) were supported by the National Science  
616 Foundation through grants OCE-1832178 (GCE-LTER Program) and OCE-1902131.  
617 Observations in the southern Caribbean Sea including the Cariaco Basin were collected  
618 as part of the CARIACO Ocean Time Series program (supported by the Consejo Nacional  
619 de Ciencia y Tecnología of Venezuela, the Ley de Ciencia, Tecnología e Innovación de  
620 Venezuela, the Estación de Investigaciones Marinas de Venezuela; the National Science  
621 Foundation grants OCE-0752139, OCE-9216626, OCE-9729284, OCE-491 9401537,  
622 OCE-9729697, OCE-9415790, OCE-9711318, OCE-0326268, OCE-0963028, OCE-



623 0326313, and OCE-0326268, NASA grants NAG5-6448, NAS5-97128, and  
624 NNX14AP62A; the Inter-American Institute for Global Change Research grant IAI-  
625 CRN3094), and the Marine Biodiversity Observation Network/MBON of the Group on  
626 Earth Observations Biodiversity Observation Network). Data provided by D.J.R. and  
627 B.D.E. was supported by ARC Linkage (LP0770222), with Norske-Skog Boyer and the  
628 Derwent Estuary Program providing financial and in-kind assistance.

629

630

### 631 **References**

- 632 Álvarez-Salgado, X. A., Nieto-Cid, M., and Rossel, P. E.: Dissolved Organic Matter, in:  
633 Marine Analytical Chemistry, edited by: Blasco, J., and Tovar-Sánchez, A., Springer  
634 International Publishing, Cham, 39-102, 10.1007/978-3-031-14486-8\_2, 2023.
- 635 Bauer, J. E., Cai, W. J., Raymond, P. A., Bianchi, T. S., Hopkinson, C. S., and Regnier,  
636 P. A.: The changing carbon cycle of the coastal ocean, *Nature*, 504, 61-70,  
637 10.1038/nature12857, 2013.
- 638 Benner, R. and Amon, R. M.: The size-reactivity continuum of major bioelements in the  
639 ocean, *Annual review of marine science*, 7, 185-205, 10.1146/annurev-marine-  
640 010213-135126, 2015.
- 641 Boudreau, B. P. and Ruddick, B. R.: On a reactive continuum representation of organic  
642 matter diagenesis, *American Journal of Science*, 291, 507-538, 1991.
- 643 Burdige, D. J. and Komada, T.: Sediment pore waters, in: *Biogeochemistry of marine*  
644 *dissolved organic matter*, edited by: Hansen, D. A., and Carlson, C. A., Elsevier, 535-  
645 577, 2014.
- 646 Carlson, C. A. and Hansell, D. A.: DOM Sources, Sinks, Reactivity, and Budgets, in:  
647 *Biogeochemistry of Marine Dissolved Organic Matter*, edited by: Carlson, C. A., and  
648 Hansell, D. A., Elsevier Science & Technology, 65-126, 10.1016/b978-0-12-405940-  
649 5.00003-0, 2015.
- 650 Carreira, C., Talbot, S., and Lønborg, C.: Bacterial consumption of total and dissolved  
651 organic carbon in the Great Barrier Reef, *Biogeochemistry*, 10.1007/s10533-021-  
652 00802-x, 2021.
- 653 Cauwet, G.: DOM in coastal areas, in: *Biogeochemistry of Dissolved organic matter*,  
654 edited by: Hansell, D., and Carlson, C. A., Academic Press, London, 579-609, 2002.
- 655 Chin, W. C., Orellana, M. V., and Verdugo, P.: Spontaneous assembly of marine  
656 dissolved organic matter into polymer gels, *Nature*, 391, 568-572, 1998.
- 657 Foreman, R. K., Björkman, K. M., Carlson, C. A., Opalk, K., and Karl, D. M.: Improved  
658 ultraviolet photo-oxidation system yields estimates for deep-sea dissolved organic  
659 nitrogen and phosphorus, *Limnology and Oceanography: Methods*, 17, 277-291,  
660 <https://doi.org/10.1002/lom3.10312>, 2019.
- 661 García-Martín, E. E., Sanders, R., Evans, C. D., Kitidis, V., Lapworth, D. J., Rees, A. P.,  
662 Spears, B. M., Tye, A., Williamson, J. L., Balfour, C., Best, M., Bowes, M., Breimann,  
663 S., Brown, I. J., Burden, A., Callaghan, N., Felgate, S. L., Fishwick, J., Fraser, M.,  
664 Gibb, S. W., Gilbert, P. J., Godsell, N., Gomez-Castillo, A. P., Hargreaves, G., Jones,  
665 O., Kennedy, P., Lichtschlag, A., Martin, A., May, R., Mawji, E., Mounteney, I.,  
666 Nightingale, P. D., Olszewska, J. P., Painter, S. C., Pearce, C. R., Pereira, M. G.,

667 Peel, K., Pickard, A., Stephens, J. A., Stinchcombe, M., Williams, P., Woodward, E.  
668 M. S., Yarrow, D., and Mayor, D. J.: Contrasting Estuarine Processing of Dissolved  
669 Organic Matter Derived From Natural and Human-Impacted Landscapes, *Global*  
670 *Biogeochemical Cycles*, 35, e2021GB007023,  
671 <https://doi.org/10.1029/2021GB007023>, 2021.

672 Halewood, E., Opalk, K., Custals, L., Carey, M., Hansell, D. A., and Carlson, C. A.:  
673 Determination of dissolved organic carbon and total dissolved nitrogen in seawater  
674 using High Temperature Combustion Analysis, *Frontiers in Marine Science*, 9,  
675 10.3389/fmars.2022.1061646, 2022.

676 Hansell, D. A.: Dissolved Organic Carbon Reference Material Program, *Eos*,  
677 *Transactions American Geophysical Union*, 86, 318-318,  
678 <https://doi.org/10.1029/2005EO350003>, 2005.

679 Hansell, D. A., Carlson, C. A., Amon, R. M. W., Álvarez-Salgado, X. A., Yamashita, Y.,  
680 Romera-Castillo, C., and Bif, M. B.: Compilation of dissolved organic matter (DOM)  
681 data obtained from global ocean observations from 1994 to 2021. Version 2. (NCEI  
682 Accession 0227166) [dataset], [doi.org/10.25921/s4f4-ye35](https://doi.org/10.25921/s4f4-ye35), 2021.

683 Iavorivska, L., Boyer, E. W., and DeWalle, D. R.: Atmospheric deposition of organic  
684 carbon via precipitation, *Atmospheric Environment*, 146, 153-163,  
685 <https://doi.org/10.1016/j.atmosenv.2016.06.006>, 2016.

686 Karl, D. M. and Björkman, K. M.: Dynamics of Dissolved Organic Phosphorus, in:  
687 *Biogeochemistry of marine dissolved organic matter*, edited by: Hansell, D. A., and  
688 Carlson, C. A., 233-334, 10.1016/b978-0-12-405940-5.00005-4, 2015.

689 Kerner, M., Hohenberg, H., Ertl, S., Reckermann, M., and Spitzzy, A.: Self-organization  
690 of dissolved organic matter tomicelle-like microparticles in river water, *Nature*, 422,  
691 150-154, 2003.

692 Knapp, A. N., Sigman, D. M., and Lipschultz, F.: N isotopic composition of dissolved  
693 organic nitrogen and nitrate at the Bermuda Atlantic Time-series Study site, *Global*  
694 *Biogeochemical Cycles*, 19, <https://doi.org/10.1029/2004GB002320>, 2005.

695 Laruelle, G. G., Dürr, H. H., Lauerwald, R., Hartmann, J., Slomp, C. P., Goossens, N.,  
696 and Regnier, P. A. G.: Global multi-scale segmentation of continental and coastal  
697 waters from the watersheds to the continental margins, *Hydrol. Earth Syst. Sci.*, 17,  
698 2029-2051, 10.5194/hess-17-2029-2013, 2013.

699 Laurenceau-Cornec, E. C., Trull, T. W., Davies, D. M., De La Rocha, C. L., and Blain,  
700 S.: Phytoplankton morphology controls on marine snow sinking velocity, *Marine*  
701 *Ecology Progress Series*, 520, 35-56, 2015.

702 Liang, Z., McCabe, K., Fawcett, S. E., Forrer, H. J., Hashihama, F., Jeandel, C.,  
703 Marconi, D., Planquette, H., Saito, M. A., Sohm, J. A., Thomas, R. K., Letscher, R. T.,  
704 and Knapp, A. N.: A global ocean dissolved organic phosphorus concentration  
705 database (DOPv2021), *Scientific Data*, 9, 772, 10.1038/s41597-022-01873-7, 2022.

706 Lønborg, C. and Álvarez-Salgado, X. A.: Recycling versus export of bioavailable  
707 dissolved organic matter in the coastal ocean and efficiency of the continental shelf  
708 pump, *Global biogeochemical cycles* 26, GB3018, 10.1029/2012GB004353, 2012.

709 Lønborg, C., Álvarez-Salgado, X. A., Davidson, K., and Miller, A. E. J.: Production of  
710 bioavailable and refractory dissolved organic matter by coastal heterotrophic  
711 microbial populations, *Estuarine, Coastal and Shelf science*, 82, 682–688,  
712 10.1016/j.ecss.2009.02.026, 2009.

713 Lønborg, C., Álvarez-Salgado, X. A., Duggan, S., and Carreira, C.: Organic matter  
714 bioavailability in tropical coastal waters: The Great Barrier Reef, *Limnology and*  
715 *Oceanography*, 63, 1015-1035, 10.1002/lno.10717, 2018.

716 Lønborg, C., Carreira, C., Jickells, T., and Álvarez-Salgado, X. A.: Impacts of Global  
717 Change on Ocean Dissolved Organic Carbon (DOC) Cycling, *Frontiers in Marine*  
718 *Science*, 7, 466, 10.3389/fmars.2020.00466, 2020.

719 Lønborg, C., Carreira, C., Abril, G., Agustí, S., Amaral, V., Andersson, A., Arístegui, J.,  
720 Bhadury, P., Bif, M. B., Borges, A. V., Bouillon, S., Calleja, M. L., Cotovicz Jr, L. C.,  
721 Cozzi, S., Doval, M. D., Duarte, C. M., Eyre, B. D., Fichot, C. G., García-Martín, E.  
722 E., Garzon-Garcia, A., Giani, M., Gonçalves-Araujo, R., Gruber, R., Hansell, D. A.,  
723 Hashihama, F., He, D., Holding, J. M., Hunter, W. R., Ibánhez, J. S., Ibello, V., Jiang,  
724 S., Kim, G., Klun, K., Kowalczyk, P., Kubo, A., Weng Lee, C., Lopes, C., Maggioni,  
725 F., Magni, P., Marrase, C., Martin, P., McCallister, S. L., McCallum, R., Medeiros, P.  
726 M., Morán, X. A. G., Muller-Karger, F., Myers-Pigg, A., Norli, M., Oakes, J. M.,  
727 Osterholz, H., Park, H., Paulsen, M. L., Rosentreter, J. A., Rueda-Roa, D., Santinelli,  
728 C., Shen, Y., Teira, E., Tinta, T., Uher, G., Wakita, M., Ward, N., Watanabe, K., Xin,  
729 Y., Yamashita, Y., Yang, L., Yeo, J., Yuan, H., Zheng, Q., and Álvarez-Salgado, X.  
730 A.: A global database of dissolved organic matter (DOM) concentration  
731 measurements in coastal waters (CoastDOM v1) [dataset], 2023.

732 Mackenzie, F. T., De Carlo, E. H., and Lerman, A.: 5.10 - Coupled C, N, P, and O  
733 Biogeochemical Cycling at the Land–Ocean Interface, in: *Treatise on Estuarine and*  
734 *Coastal Science*, edited by: Wolanski, E., and McLusky, D., Academic Press,  
735 Waltham, 317-342, <https://doi.org/10.1016/B978-0-12-374711-2.00512-X>, 2011.

736 Mopper, K., Kieber, D. J., and Stubbins, A.: Marine Photochemistry of Organic Matter,  
737 in: *Biogeochemistry of Marine Dissolved Organic Matter*, edited by: Carlson, C. A.,  
738 and Hansell, D. A., 389-450, 10.1016/b978-0-12-405940-5.00008-x, 2015.

739 Osterholz, H., Burmeister, C., Busch, S., Dierken, M., Frazão, H. C., Hansen, R.,  
740 Jeschek, J., Kremp, A., Kreuzer, L., and Sadkowiak, B.: Nearshore dissolved and  
741 particulate organic matter dynamics in the southwestern Baltic Sea: environmental  
742 drivers and time series analysis (2010–2020), *Frontiers in Marine Science*, 8,  
743 795028, 2021.

744 Raymond, P. A. and Spencer, R. G. M.: Riverine DOM, in: *Biogeochemistry of Marine*  
745 *Dissolved Organic Matter*, edited by: Hansell, D. A., and Carlson, C. A., Elsevier,  
746 Amsterdam, 509-533, 10.1016/b978-0-12-405940-5.00011-x, 2015.

747 Redfield, A. C., Ketchum, B. K., and Richards, F. A.: The influence of organisms on the  
748 composition of sea-water, in: *The sea*, vol. 2, *The composition of sea water:*  
749 *Comparative and descriptive oceanography*, edited by: Hill, M. N., Wiley-Interscience,  
750 26- 77, 1963.

751 Santos, I. R., Burdige, D. J., Jennerjahn, T. C., Bouillon, S., Cabral, A., Serrano, O.,  
752 Wernberg, T., Filbee-Dexter, K., Guimond, J. A., and Tamborski, J. J.: The  
753 renaissance of Odum's outwelling hypothesis in 'Blue Carbon' science, *Estuarine,*  
754 *Coastal and Shelf Science*, 255, 10.1016/j.ecss.2021.107361, 2021.

755 Sharp, J. H., Benner, R., Bennett, L., Carlson, C. A., Dow, R., and Fitzwater, S. E.: Re-  
756 evaluation of high temperature combustion and chemical oxidation measurements of  
757 dissolved organic carbon in seawater, *Limnology and Oceanography*, 38, 1774-1782,  
758 <https://doi.org/10.4319/lo.1993.38.8.1774>, 1993.

759 Sharp, J. H., Rinker, K. R., Savidge, K. B., Abell, J., Benaim, J. Y., Bronk, D., Burdige,  
760 D. J., Cauwet, G., Chen, W., Doval, M. D., Hansell, D., Hopkinson, C., Kattner, G.,  
761 Kaumeyer, N., McGlathery, K. J., Merriam, J., Morley, N., Nagel, K., Ogawa, H.,  
762 Pollard, C., Pujo-Pay, M., Raimbault, P., Sambrotto, R., Seitzinger, S., Spyres, G.,  
763 Tirendi, F., Walsh, T. W., and Wong, C. S.: A preliminary methods comparison for  
764 measurement of dissolved organic nitrogen in seawater, *Marine Chemistry*, 78, 171-  
765 184, 2002.

766 Sipler, R. E. and Bronk, D. A.: Dynamics of Dissolved Organic Nitrogen, in:  
767 Biogeochemistry of Marine Dissolved Organic Matter, edited by: Hansell, D. A., and  
768 Carlson, C. A., 127-232, 10.1016/b978-0-12-405940-5.00004-2, 2015.

769 Solorzano, L. and Sharp, J. H.: Determination of total dissolved phosphorus and  
770 particulate phosphorus in natural waters, *Limnology and Oceanography*, 25, 754-  
771 758, 1980.

772 Taniguchi, M., Dulai, H., Burnett, K. M., Santos, I. R., Sugimoto, R., Stieglitz, T., Kim,  
773 G., Moosdorf, N., and Burnett, W. C.: Submarine Groundwater Discharge: Updates  
774 on Its Measurement Techniques, Geophysical Drivers, Magnitudes, and Effects,  
775 *Frontiers in Environmental Science*, 7, 10.3389/fenvs.2019.00141, 2019.

776 Valderrama, J. C.: The simultaneous analysis of total nitrogen and total phosphorus in  
777 natural waters, *Marine Chemistry*, 10, 109-122, 1981.

778 Wada, S., Aoki, M. N., Mikami, A., Komatsu, T., Tsuchiya, Y., Sato, T., Shinagawa, H.,  
779 and Hama, T.: Bioavailability of macroalgal dissolved organic matter in seawater,  
780 *Marine Ecology Progress Series*, 370, 33-44, 2008

781

782 **Figure legends**

783 **Figure 1.** Flow diagram of data collation, quality control and inclusion into CoastDOM v1  
784 database.

785 **Figure 2.** Histograms showing the distribution of observations for **a)** dissolved organic  
786 carbon (DOC), **b)** nitrogen (DON) and **c)** phosphorus (DOP), within defined  
787 concentration ranges in the coastal ocean. Note that the concentration ranges are not  
788 uniform in all cases due to the large difference in concentrations.

789 **Figure 3. a)** Cumulative number of concentration observations for dissolved organic  
790 carbon (DOC), nitrogen (DON), and phosphorus (DOP). Number of concentration  
791 observations shown as a function of **b)** sampling month (“N.S” are samples for which  
792 the sampling month is not specified), **c)** latitude, and **d)** longitude, grouped into bins of  
793 10° latitude or longitude.

794 **Figure 4** Global distribution of concentration observations included in CoastDOM v1 for  
795 **a)** dissolved organic carbon (DOC), **b)** nitrogen (DON), and **c)** phosphorus (DOP). The  
796 black dots on the map represent the reported data that are included in the CoastDOM  
797 v1 database. Histograms show the distribution of observations for DOC, DON and DOP  
798 within defined concentration ranges in the continents where measurements are  
799 available. Maps were created using the GIS shape file obtained from Laurelle et al.  
800 (Laruelle et al., 2013)

801 **Table 1.** Descriptive statistics for the dissolved organic carbon (DOC), dissolved organic  
802 nitrogen (DON), and dissolved organic phosphorus (DOP) concentration observations  
803 included in the CoastDOM v1 dataset. The DOC:DON, DOC:DOP and DON:DOP ratios  
804 are also reported. The minimum (Min), maximum (Max), average values (Avg.) and  
805 standard deviation (SD), coefficient of variation (CV %), median, 25th and 75th  
806 percentiles (perc.) and number of samples (N) for each variable are shown.

|               | <b>DOC</b><br>$\mu\text{mol L}^{-1}$ | <b>DON</b><br>$\mu\text{mol L}^{-1}$ | <b>DOP</b><br>$\mu\text{mol L}^{-1}$ | <b>DOC:DON</b> | <b>DOC:DOP</b>  | <b>DON:DOP</b> |
|---------------|--------------------------------------|--------------------------------------|--------------------------------------|----------------|-----------------|----------------|
| Min           | 17                                   | < 0.1                                | < 0.01                               | 1              | 18              | 0.14           |
| Max           | 30327                                | 2095.3                               | 84.27                                | 3046           | 248024          | 8894           |
| Avg. $\pm$ SD | 182 $\pm$ 314                        | 13.6 $\pm$ 30.4                      | 0.34 $\pm$ 1.11                      | 18 $\pm$ 43    | 1171 $\pm$ 4248 | 100 $\pm$ 580  |
| Median        | 103                                  | 8.0                                  | 0.18                                 | 14             | 583             | 47             |
| CV            | 173                                  | 224                                  | 324                                  | 244            | 363             | 578            |
| 25%iles       | 77                                   | 5.5                                  | 0.11                                 | 11             | 401             | 30             |
| 75%iles       | 228                                  | 15.8                                 | 0.30                                 | 18             | 1034            | 78             |
| N             | 62339                                | 20357                                | 13534                                | 12632          | 7415            | 12954          |

807

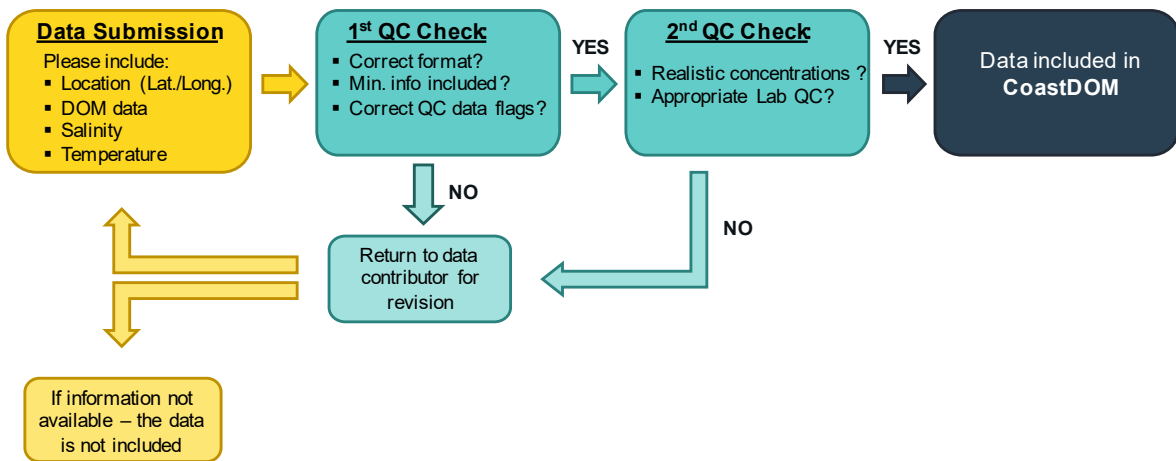

808

809 **Figure 1.**

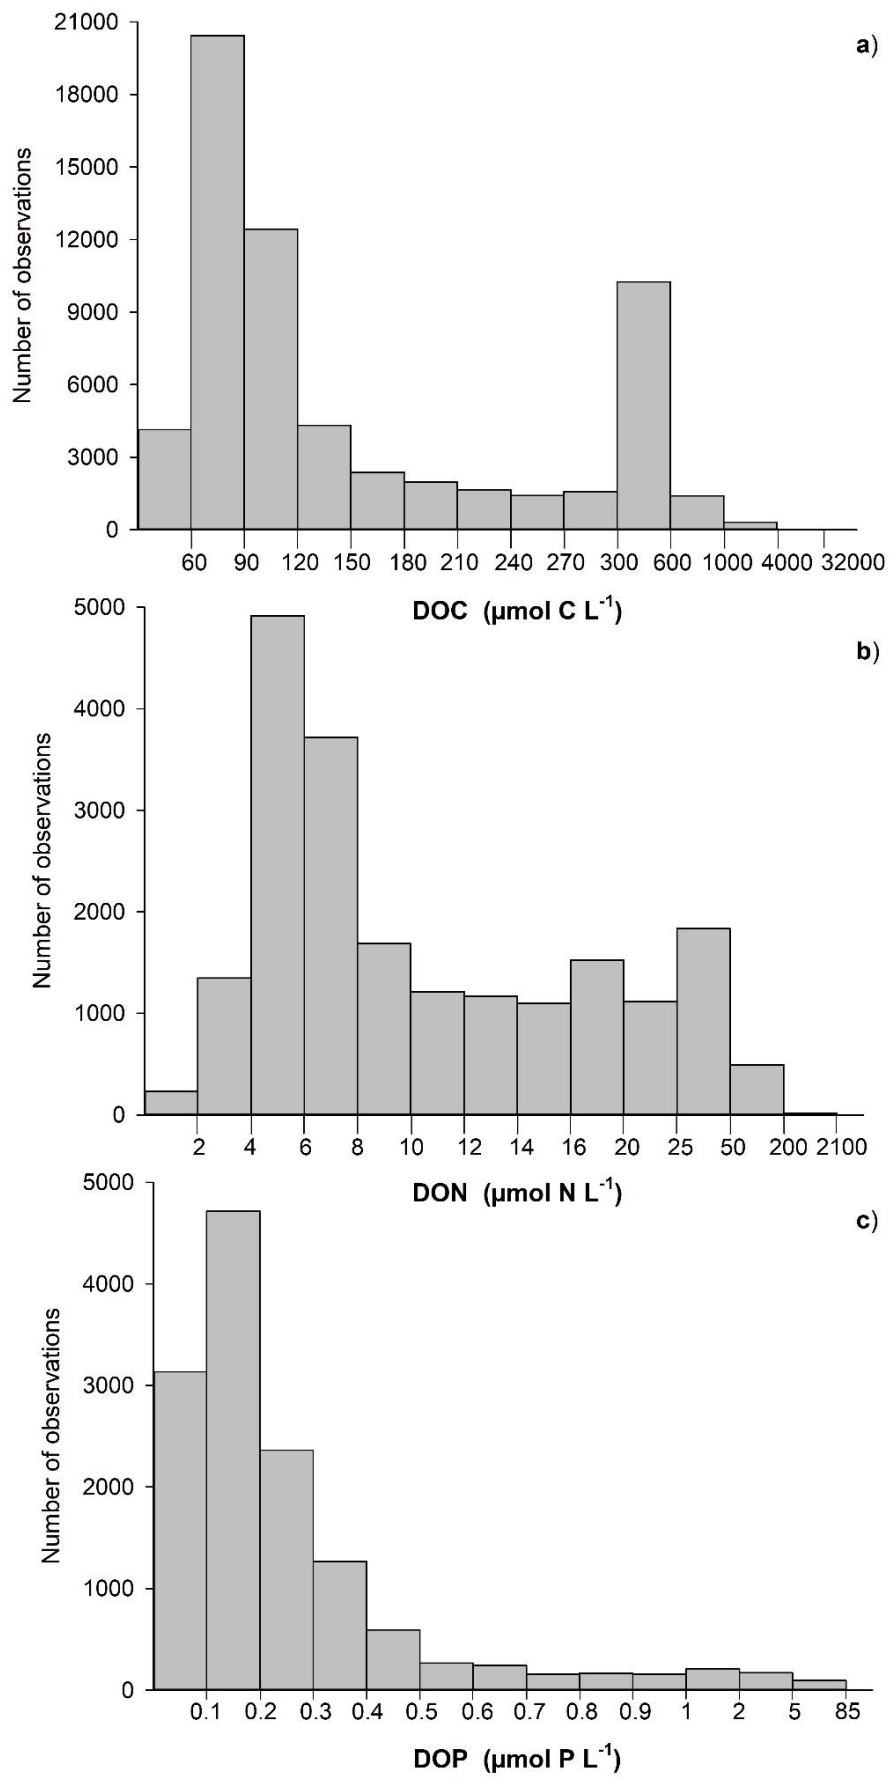

810

811 **Figure 2.**



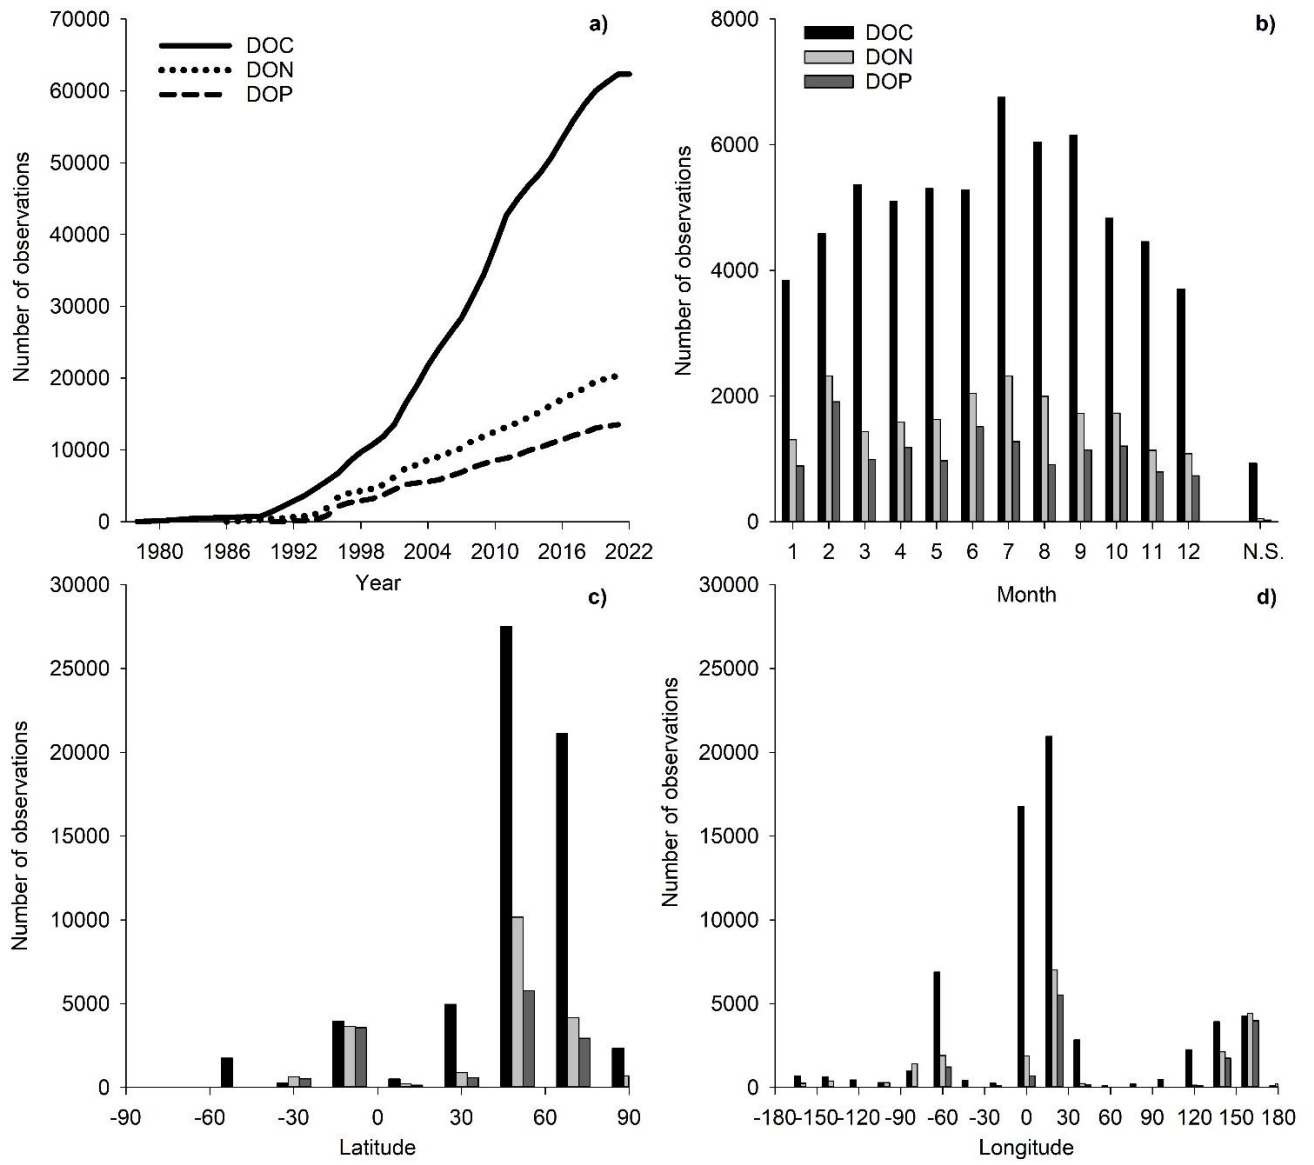

812

813 **Figure 3.**

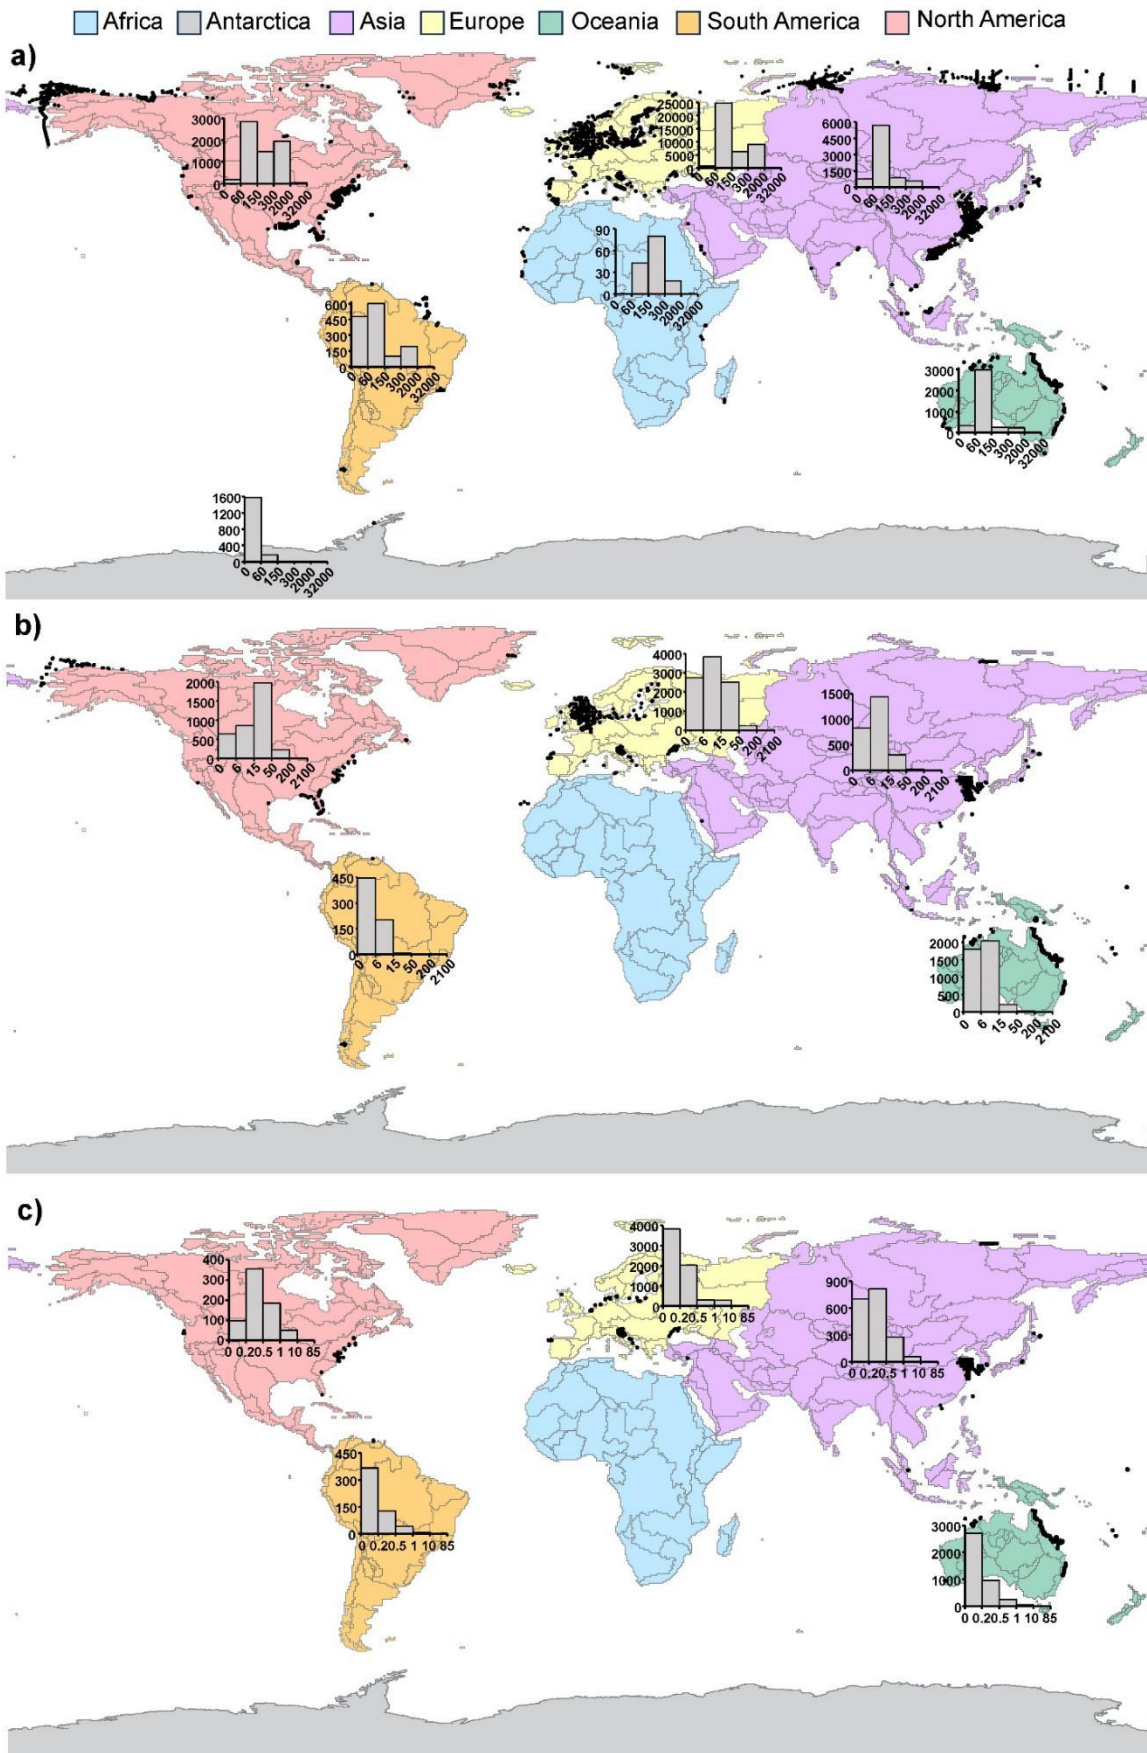

814

815 **Figure 4.**

1 **A global database of dissolved organic matter (DOM) concentration**

2 **measurements in coastal waters (CoastDOM v1)**

3 Christian Lønborg<sup>1</sup>, Cátia Carreira<sup>2</sup>, Gwenaël Abril<sup>3</sup>, Susana Agustí<sup>4</sup>, Valentina Amaral<sup>5</sup>,  
4 Agneta Andersson<sup>6</sup>, Javier Arístegui<sup>7</sup>, Punyasloke Bhadury<sup>8</sup>, Mariana B. Bif<sup>9</sup>, Alberto V.  
5 Borges<sup>10</sup>, Steven Bouillon<sup>11</sup>, Maria LI. Calleja<sup>4,12</sup>, Luiz C. Cotovicz Jr<sup>13,49</sup>, Stefano Cozzi<sup>14</sup>,  
6 Maryló Doval<sup>15</sup>, Carlos M. Duarte<sup>4</sup>, Bradley Eyre<sup>16</sup>, Cédric G. Fichot<sup>17</sup>, E. Elena García-  
7 Martín<sup>18</sup>, Alexandra Garzon-Garcia<sup>19</sup>, Michele Giani<sup>20,21</sup>, Rafael Gonçalves-Araujo<sup>22</sup>,  
8 Renee Gruber<sup>23</sup>, Dennis A. Hansell<sup>24</sup>, Fuminori Hashihama<sup>25</sup>, Ding He<sup>26</sup>, Johnna M.  
9 Holding<sup>27</sup>, William R. Hunter<sup>28</sup>, J. Severino P. Ibánhez<sup>29</sup>, Valeria Ibello<sup>30</sup>, Shan Jiang<sup>31</sup>,  
10 Guebuem Kim<sup>32</sup>, Katja Klun<sup>33</sup>, Piotr Kowalczyk<sup>34</sup>, Atsushi Kubo<sup>35</sup>, Choon Weng Lee<sup>36</sup>,  
11 Cláudia B. Lopes<sup>37</sup>, Federica Maggioni<sup>38</sup>, Paolo Magni<sup>39</sup>, Celia Marrase<sup>40</sup>, Patrick  
12 Martin<sup>41</sup>, S. Leigh McCallister<sup>42</sup>, Roisin McCallum<sup>43</sup>, Patricia M. Medeiros<sup>44</sup>, Xosé Anxelu  
13 G. Morán<sup>4,45</sup>, Frank E. Muller-Karger<sup>46</sup>, Allison Myers-Pigg<sup>47</sup>, Marit Norli<sup>48</sup>, Joanne M.  
14 Oakes<sup>15</sup>, Helena Osterholz<sup>49</sup>, Hyekyung Park<sup>32</sup>, Maria Lund Paulsen<sup>50</sup>, Judith A.  
15 Rosentreter<sup>16,51</sup>, Jeff D. Ross<sup>52</sup>, Digna Rueda-Roa<sup>46</sup>, Chiara Santinelli<sup>53</sup>, Yuan Shen<sup>54</sup>,  
16 Eva Teira<sup>55</sup>, Tinkara Tinta<sup>33</sup>, Guenther Uher<sup>56</sup>, Masahide Wakita<sup>57</sup>, Nicholas Ward<sup>47</sup>,  
17 Kenta Watanabe<sup>58</sup>, Yu Xin<sup>59</sup>, Youhei Yamashita<sup>60</sup>, Liyang Yang<sup>61</sup>, Jacob Yeo<sup>16</sup>, Huamao  
18 Yuan<sup>62</sup>, Qiang Zheng<sup>54,63</sup>, Xosé Antón Álvarez-Salgado<sup>29</sup>

19 <sup>1</sup>Section for Marine Diversity and Experimental Ecology, Department of Ecoscience,  
20 Aarhus University, 4000 Roskilde, Denmark.

21 <sup>2</sup>Department of Environmental Science, Aarhus University, 4000 Roskilde, Denmark.

22 <sup>3</sup>Laboratoire de Biologie des Organismes et Ecosystèmes Aquatiques (BOREA), CNRS,  
23 Muséum National d'Histoire Naturelle, 61 rue Buffon, 75005, Paris, France.

24 <sup>4</sup>King Abdullah University of Science and Technology, Thuwal 23955-6900, Kingdom of  
25 Saudi Arabia.

26 <sup>5</sup>Departamento Interdisciplinario de Sistemas Costero Marinos, Centro Universitario  
27 Regional Este, Universidad de la República, Ruta 9 y 15, CP 27000, Rocha, Uruguay.  
28 <sup>6</sup>Umeå Marine Sciences Centre, Umeå University, Sweden.  
29 <sup>7</sup>Instituto de Oceanografía y Cambio Global (IOGAG), Universidad de Las Palmas de  
30 Gran Canaria, Las Palmas, Spain.  
31 <sup>8</sup>Centre for Climate and Environmental Studies, Indian Institute of Science Education  
32 and Research Kolkata, Mohanpur, Nadia, West Bengal, India.  
33 <sup>9</sup>Monterey Bay Aquarium Research Institute, Moss Landing, California, United States.  
34 <sup>10</sup>University of Liège, Chemical Oceanography Unit, Liège, Belgium.  
35 <sup>11</sup>KU Leuven, Department of Earth and Environmental Sciences, Leuven, Belgium.  
36 <sup>12</sup>Marine Ecology and Systematics (MarES), Department of Biology, Universitat de les  
37 Illes Balears, 07122 Palma de Mallorca, Spain.  
38 <sup>13</sup>Departamento de Geoquímica, Universidade Federal Fluminense, Outeiro São João  
39 Batista s/n, 24020015 Niterói, RJ, Brazil.  
40 <sup>14</sup>Consiglio Nazionale delle Ricerche, Istituto di Scienze Marine (CNR-ISMAR), Strada  
41 Statale 14, km 163.5, 34149 Trieste, Italy.  
42 <sup>15</sup>Instituto Tecnológico para o Control do Medio Mariño de Galicia, 36611 Vilagarcía de  
43 Arousa, Spain.  
44 <sup>16</sup>Centre for Coastal Biogeochemistry, Faculty of Science and Engineering, Southern  
45 Cross University, Lismore 2480, NSW, Australia.  
46 <sup>17</sup>Department of Earth and Environment, Boston University, Boston, MA, United States.  
47 <sup>18</sup>National Oceanography Centre, European Way, Southampton, SO14 3ZH, United  
48 Kingdom.  
49 <sup>19</sup>Department of Environment and Science, PO Box 5078, Brisbane, Queensland 4001,  
50 Australia.  
51 <sup>20</sup>National Institute of Oceanography and Applied Geophysics (OGS), Trieste, Italy.

52 <sup>21</sup>Istituto Centrale per la Ricerca scientifica e tecnologia Applicata al MAre, Chioggia,  
53 Italy

54 <sup>22</sup>National Institute of Aquatic Resources, Technical University of Denmark, Kgs.  
55 Lyngby, Denmark.

56 <sup>23</sup>Australian Institute of Marine Science, PMB 3, Townsville QLD 4810, Australia.  
57 <sup>24</sup>Department of Ocean Sciences, Rosenstiel School of Marine and Atmospheric  
58 Science, University of Miami, Miami, FL, United States.

59 <sup>25</sup>Tokyo University of Marine Science and Technology, Japan.

60 <sup>26</sup>Department of Ocean Science and Center for Ocean Research in Hong Kong and  
61 Macau, The Hong Kong University of Science and Technology, Clear Water Bay, Hong  
62 Kong, China.

63 <sup>27</sup>Department of Ecoscience, Aarhus University, 8000 Aarhus, Denmark.

64 <sup>28</sup>Fisheries and Aquatic Ecosystems Branch, Agri-Food and Biosciences Institute,  
65 Belfast, Northern Ireland, United Kingdom.

66 <sup>29</sup>CSIC, Instituto de Investigaci3n Mariñas, Eduardo Cabello 6, 36208 Vigo, Spain.

67 <sup>30</sup>Institute of Marine Sciences, Middle East Technical University, 33731 Erdemli-Mersin,  
68 Turkey.

69 <sup>31</sup>State Key Laboratory of Estuarine and Coastal Research, East China Normal  
70 University, 200241, Shanghai, China.

71 <sup>32</sup>School of Earth and Environmental Sciences, Seoul National University, Seoul 08826,  
72 Korea.

73 <sup>33</sup>Marine Biology Station, National Institute of Biology, Fornače 41, 6330 Piran,  
74 Slovenia.

75 <sup>34</sup>Remote Sensing Laboratory, Institute of Oceanology, Polish Academy of Sciences,  
76 Sopot, Poland.

77 <sup>35</sup>Department of Geosciences, Shizuoka University, 836 Ohya, Suruga-ku, Shizuoka,  
78 422-8529, Japan.

79 <sup>36</sup>Laboratory of Microbial Ecology, Institute of Biological Sciences, Institute of Ocean  
80 and Earth Sciences, Universiti Malaya, 50603 Kuala Lumpur, Malaysia.

81 <sup>37</sup>CICECO – Aveiro Institute of Materials, Department of Chemistry, University of Aveiro,  
82 Campus de Santiago, 3810-193 Aveiro, Portugal.

83 <sup>38</sup>University of New Caledonia and Institute de recherche pour le development (IRD),  
84 New Caledonia.

85 <sup>39</sup>Consiglio Nazionale delle Ricerche, Istituto per lo studio degli impatti Antropici e  
86 Sostenibilità in ambiente marino (CNR-IAS), Loc. Sa Mardini, Torregrande, 09170,  
87 Oristano, Italy.

88 <sup>40</sup>Institut de Ciències del Mar (CSIC), Passeig Marítim de la Barceloneta, 37  
89 08003 Barcelona, Spain.

90 <sup>41</sup>Asian School of the Environment, Nanyang Technological University, 639798,  
91 Singapore.

92 <sup>42</sup>Virginia Commonwealth University, Department of Biology, Richmond, Virginia, United  
93 States.

94 <sup>43</sup>Centre for Marine Ecosystems Research, School of Science, Edith Cowan University,  
95 270 Joondalup Drive, Joondalup 6027 WA, Australia.

96 <sup>44</sup>Department of Marine Sciences, University of Georgia, Athens, Georgia, United  
97 States.

98 <sup>45</sup>Centro Oceanográfico de Gijón/Xixón, Instituto Español de Oceanografía, Gijón/Xixón,  
99 Spain.

100 <sup>46</sup>College of Marine Science, University of South Florida, Saint Petersburg, Florida  
101 33701, United States.

102 <sup>47</sup>Pacific Northwest National Laboratory, Marine and Coastal Research Laboratory,  
103 Sequim, Washington, United States.

104 <sup>48</sup>Norwegian Institute for Water Research, Oslo, Norway.

105 <sup>49</sup>Leibniz Institute for Baltic Sea Research Warnemünde, D-18119 Rostock-  
106 Warnemünde, Germany.

107 <sup>50</sup>Marine microbiology, University of Bergen, Norway.

108 <sup>51</sup>Yale School of the Environment, Yale University, New Haven, Connecticut, United  
109 States.

110 <sup>52</sup>Institute for Marine and Antarctic Studies, University of Tasmania, Private Bag 49,  
111 Hobart, Tasmania 7001, Australia

112 <sup>53</sup>Biophysics Institute, CNR, Pisa, Italy.

113 <sup>54</sup>State Key Laboratory of Marine Environmental Science (MEL) & College of Ocean  
114 and Earth Sciences, Xiamen University, China.

115 <sup>55</sup>Departamento de Ecología y Biología Animal, Universidade de Vigo, Centro de  
116 Investigación Mariña da Universidade de Vigo (CIM-UVigo), Vigo, Spain.

117 <sup>56</sup>School of Natural and Environmental Science, Newcastle University, Newcastle upon  
118 Tyne, United Kingdom.

119 <sup>57</sup>Mutsu Institute for Oceanography, Research Institute for Global Change, Japan  
120 Agency for Marine-Earth Science and Technology, 690 Kitasekine, Sekine, Mutsu,  
121 Aomori, Japan.

122 <sup>58</sup>Coastal and Estuarine Environment Research Group, Port and Airport Research  
123 Institute, Yokosuka 239-0826, Japan.

124 <sup>59</sup>Key Laboratory of Marine Chemistry Theory and Technology, Ministry of Education,  
125 Institute for Advanced Ocean Study, Ocean University of China, Qingdao, Shandong,  
126 China.

127 <sup>60</sup>Faculty of Environmental Earth Science, Hokkaido University, Hokkaido 060-0810,  
128 Japan.

129 <sup>61</sup>College of Environment and Safety Engineering, Fuzhou University, China.

130 <sup>62</sup>Key Laboratory of Marine Ecology and Environmental Sciences, Institute of  
131 Oceanology, Chinese Academy of Sciences, Qingdao, China.

132 <sup>63</sup>Fujian Key Laboratory of Marine Carbon Sequestration, Xiamen University, Xiamen  
133 361102, China.

134

135 \*Corresponding author:

136 E-mail: [c.lonborg@ecos.au.dk](mailto:c.lonborg@ecos.au.dk) or [clonborg@gmail.com](mailto:clonborg@gmail.com)

137

138 **ORCID nr.:**

139 Christian Lønborg: 0000-0001-8380-0238

140 Cátia Carreira: 0000-0002-1520-9320

141 Gwenaël Abril: 0000-0002-4914-086X

142 Susana Agustí: 0000-0003-0536-7293

143 Valentina Amaral: 0000-0002-1088-1484

144 Agneta Andersson: 0000-0001-7819-9038

145 Javier Arístegui: 0000-0002-7526-7741

146 Punyasloke Bhadury: 0000-0001-8714-7475

147 Mariana Bernardi Bif: 0000-0002-2148-4556

148 Alberto V. Borges: 0000-0002-5434-2247

149 Steven Bouillon: 0000-0001-7669-2929

150 Maria LI. Calleja: 0000-0002-5992-2013

151 Luiz C. Cotovicz Jr: 0000-0002-3914-8155

152 Stefano Cozzi: 0000-0003-0116-742X

153 Maryló Doval: 0000-0002-8565-8703

154 Carlos M. Duarte: 0000-0002-1213-1361

155 Bradley Eyre: 0000-0001-5502-0680

156 Cédric G. Fichot: 0000-0002-1099-5764

157 E. Elena García-Martín: 0000-0003-4807-3287

158 Alexandra Garzon-Garcia: 0000-0002-6804-8890

159 Michele Giani: 0000-0002-3306-7725

160 Rafael Gonçalves-Araujo: 0000-0001-8344-8326

161 Renee Gruber: 0000-0002-8788-6910

162 Dennis A. Hansell: 0000-0001-9275-3445

163 Fuminori Hashihama: 0000-0003-3835-7681

164 Ding He: 0000-0001-9620-6115

165 Johnna M. Holding: 0000-0002-7364-0055

166 William R. Hunter: 0000-0001-8801-7947



167 J. Severino P. Ibánhez: 0000-0001-6093-3054  
168 Valeria Ibello: 0000-0002-1067-0425  
169 Shan Jiang: 0000-0002-1121-6080  
170 Guebuem Kim: 0000-0002-5119-0241  
171 Katja Klun: 0000-0001-6111-1650  
172 Piotr Kowalczyk: 0000-0001-6016-0610  
173 Atsushi Kubo: 0000-0002-6457-5386  
174 Choon Weng Lee: 0000-0001-9805-9980  
175 Cláudia Lopes: 0000-0001-7378-8677  
176 Federica Maggioni: 0000-0002-7109-4257  
177 Paolo Magni: 0000-0001-5955-6829  
178 Celia Marrase: 0000-0002-5097-4829  
179 Patrick Martin: 0000-0001-8008-5558  
180 S. Leigh McCallister: 0000-0002-9041  
181 Roisin McCallum: 0000-0002-0358-2371  
182 Patricia M. Medeiros: 0000-0001-6818-2603  
183 Xosé Anxelu G. Morán: 0000-002-9823-5339  
184 Frank Muller-Karger: 0000-0003-3159-5011  
185 Allison Myers-Pigg: 0000-0002-6905-6841  
186 Marit Norli: 0000-0001-7472-1562  
187 Joanne M. Oakes: 0000-0002-9287-2652  
188 Helena Osterholz: 0000-0002-2858-9799  
189 Hyekyung Park: 0000-0002-4743-5883  
190 Maria Lund Paulsen: 0000-0002-1474-7258  
191 Jeff D. Ross: 0000-0002-8659-3833  
192 Judith A. Rosentreter: 0000-0001-5787-5682  
193 Digna Rueda-Roa: 000-0003-4621-009X  
194 Chiara Santinelli: 0000-0002-8921-275X  
195 Yuan Shen: 0000-0001-6618-4226  
196 Eva Teira: 0000-0002-4333-0101  
197 Tinkara Tinta: 0000-0001-6740-8973  
198 Guenther Uher: 0000-0001-5105-4445  
199 Masahide Wakita: 0000-0002-3333-0546  
200 Nicholas Ward: 0000-0001-6174-5581  
201 Kenta Watanabe: 0000-0002-0106-3623  
202 Yu Xin: 0000-0002-5328-7717  
203 Youhei Yamashita: 0000-0002-9415-8743  
204 Liyang Yang: 0000-0001-8767-8698  
205 Jacob Yeo: 0000-0003-2443-5378  
206 Huamao Yuan: 0000-0003-2014-619X  
207 Qiang Zheng: 0000-0002-6836-2310  
208 Xosé Antón Álvarez-Salgado: 0000-0002-2387-9201

209 **Abstract**

210 ~~M~~The measurements of dissolved organic carbon (DOC), nitrogen (DON), and  
211 phosphorus (DOP) concentrations are used to characterize the dissolved organic matter  
212 (DOM) pool and are important components of biogeochemical cycling in the coastal  
213 ocean. Here, we present the first edition of a global database (CoastDOM v1; available  
214 at <https://doi.pangaea.de/10.1594/PANGAEA.964012>) compiling previously published  
215 and unpublished measurements of DOC, DON, and DOP ~~collected~~ in coastal waters.  
216 These data are complemented by hydrographic data such as temperature and salinity  
217 and, to the extent possible, other biogeochemical variables (e.g., Chlorophyll-a, inorganic  
218 nutrients) and the inorganic carbon system (e.g., dissolved inorganic carbon and total  
219 alkalinity). Overall, CoastDOM v1 includes observations of concentrations from all  
220 continents. ~~H~~However, most data were collected in the Northern Hemisphere, with a clear  
221 gap in coastal water DOM measurements from the Southern Hemisphere. The data  
222 included were collected from 1978 to 2022 and consist of 62339 data points for DOC,  
223 20360 for DON, and 13440 for DOP. The number of measurements decreases  
224 progressively in the sequence DOC > DON > DOP, reflecting both differences in the  
225 maturity of the analytical methods and the greater focus on carbon cycling by the aquatic  
226 science community. The global database shows that the average DOC concentration in  
227 coastal waters (average ~~±~~ (standard deviation; ~~-~~ (SD): 182 ~~±~~ (314)  $\mu\text{mol C L}^{-1}$ ; median:  
228 103  $\mu\text{mol C L}^{-1}$ ); is 13-fold ~~greathigher~~ than the average coastal DON concentrations  
229 (average ~~±~~ (SD): 13.6 ~~±~~ (30.4)  $\mu\text{mol N L}^{-1}$ ; median: 8.0  $\mu\text{mol N L}^{-1}$ ), which ~~was-is~~ itself 39-  
230 fold ~~highgreater~~ than the average coastal DOP concentrations (average ~~±~~ (SD): 0.34  $\pm$   
231 1.11  $\mu\text{mol P L}^{-1}$ ; median: 0.18  $\mu\text{mol P L}^{-1}$ ). This dataset will be useful ~~to-for~~ identifying  
232 global spatial and temporal patterns in DOM and ~~help to-facilitate~~ ing thee reuse of DOC,  
233 DON, and DOP data in studies aimed at better ~~characteris~~ characterizing ~~inge~~ local  
234 biogeochemical processes, closing ~~e~~ nutrient budgets, estimating ~~e~~ carbon, nitrogen, and

235 phosphorous pools, as well as ~~establishing identifying~~ a baseline for modelling future  
236 changes in coastal waters.

237

238 **Keywords:** Dissolved organic matter, Dissolved organic carbon, Dissolved organic  
239 nitrogen, Dissolved organic phosphorus, Coastal waters, Global database.

240 **1. Introduction**

241 Coastal waters are the most biogeochemical dynamic areas of the ocean, exhibiting  
242 the highest standing stocks, process rates and transport fluxes of carbon (C), nitrogen  
243 (N), and phosphorus (P) per unit area (Bauer et al., 2013; Mackenzie et al., 2011). In  
244 these areas, organic matter plays a critical role in numerous biogeochemical processes,  
245 serving as both a C, N, and P reservoir and substrate (Carreira et al., 2021).

246 Organic material found in the marine environment is commonly distinguished by its  
247 size; material retained on a filter with a pore size typically between 0.2 and 0.7  $\mu\text{m}$  is  
248 classified as particulate organic matter (POM), whereas organic matter that passes  
249 through the filter is referred to as dissolved organic matter (DOM). This partitioning is  
250 operational but has implications for biogeochemical cycling: POM can be suspended in  
251 the water column or sink to the sediments controlled by its size, shape and density  
252 (Laurenceau-Cornec et al., 2015), whereas DOM is a solute that mostly remains in the  
253 water column. In most coastal waters, DOM concentrations are higher than POM, with  
254 POM having a larger proportion of known biochemical classes (e.g., carbohydrates,  
255 proteins) than the dissolved fraction, suggesting that generally, DOM is more reworked  
256 and recalcitrant ~~In most coastal waters, the DOM concentrations are greater than POM,~~  
257 ~~with the POM fraction being less degraded and more bioavailable~~ (Boudreau and  
258 Ruddick, 1991; Lønborg et al., 2018; Benner and Amon, 2015).

259 The DOM pool consists mainly of C (DOC), N (DON), and P (DOP) but it also includes  
260 other elements such as oxygen, sulphur and trace elements (Lønborg et al., 2020). In  
261 coastal waters, DOM originates from multiple sources. Internal, or autochthonous,  
262 sources include planktonic organisms (Lønborg et al., 2009; Carlson and Hansell, 2015),  
263 benthic microalgae, macrophytes, and sediment porewater (Burdige and Komada, 2014;  
264 Wada et al., 2008). On the other hand, DOM from external, or allochthonous, sources,  
265 has mainly terrestrial origins, including wetlands, river and surface runoff, groundwater

266 discharges, and atmospheric deposition (Lavorivska et al., 2016; Raymond and Spencer,  
267 2015; Taniguchi et al., 2019; Santos et al., 2021). The main sinks for DOM from the water  
268 column in coastal waters are: 1) bubble coagulation and abiotic flocculation (Kerner et al.,  
269 2003) or sorption to particles (Chin et al., 1998); 2) sunlight-mediated photodegradation  
270 (Mopper et al., 2015); and 3) microbial degradation by mainly heterotrophic prokaryotes  
271 (Lønborg and Álvarez-Salgado, 2012).

272 Given the importance of DOM as a source of nutrients and for coastal biogeochemical  
273 cycling in general, numerous studies have measured the C, N and P content of the DOM  
274 pool over the last few decades (e.g., García-Martín et al., 2021; Cauwet, 2002; Osterholz  
275 et al., 2021). Most data, however, are often unavailable or stored in an inaccessible  
276 manner, making it difficult to e.g., analyse global spatial and temporal patterns effectively.

277 ~~A~~ global open ocean DOM data compilation for DOC, total dissolved nitrogen (TDN),  
278 DON (Hansell et al., 2021) and DOP (Liang et al., 2022; Karl and Björkman, 2015) already  
279 exists, and contains few coastal samples (< 200m) (Hansell et al., 2021), but there are  
280 no compilation specifically -focused on coastal waters. Hence, there is a clear need for a  
281 comprehensive global and integrated database of DOC, DON and DOP measurements  
282 for coastal waters. To address this need, we have prepared the first edition of a coastal  
283 DOM database (named CoastDOM v1), by compiling both previously reported as well as  
284 unpublished data. These data have been obtained from authors of the original studies or  
285 extracted directly from the original studies. In order to allow the DOM measurements to  
286 be interpreted across larger scales, and to better understand their relationship with local  
287 environmental conditions, we have included concurrently collected ancillary data (such  
288 as physical and/or chemical seawater properties) whenever available. The objective of  
289 this database is multifaceted. Firstly, we aimed to compile all available coastal DOM data  
290 into a single repository. Secondly, our intention was to make these data easily accessible  
291 to the research community and thirdly, we sought to achieve long-term consistency of the

292 measurements, to enable data intercomparison, and establish a robust baseline for  
293 assessing, for example, the impacts of climate change and land use changes.

## 294 **2. Methods**

### 295 **2.1. Data compilation**

296 The measurements included in CoastDOM v1 were obtained either directly from  
297 authors of previously published studies, online databases, or scientific papers. An  
298 extensive search of published reports, Ph.D. theses, and peer-reviewed literature was  
299 performed to identify studies dealing with DOM in coastal waters. First, a formal search  
300 was performed using Google Scholar in January 2022 using the search terms “dissolved  
301 organic carbon”, “dissolved organic nitrogen”, and “dissolved organic phosphorus” in  
302 connection with “marine” or “ocean”, which yielded a total of 897 articles (after filtering  
303 the query by searching content in the title and abstract and excluding non-coastal  
304 articles). When data could not be obtained directly from the corresponding authors,  
305 relevant data were extracted. Further searches for relevant datasets were conducted  
306 using the reference lists of the identified scientific papers as well as databases and  
307 repositories to capture as many datasets as possible. Additionally, research groups that  
308 were invited to participate in this effort were also encouraged to submit unpublished data  
309 to CoastDOM v1.

310

### 311 **2.2. Dissolved organic matter analysis**

312 The DOC concentrations included in CoastDOM v1 were commonly measured using a  
313 total organic carbon (TOC) high-temperature catalytic oxidation (HTCO) analyser (81%  
314 of samples; (Sharp et al., 1993). Some were measured by a combined wet chemical  
315 oxidation (WCO) step and/or UV digestion, after which the carbon dioxide generated was  
316 quantified (19% of samples). Similarly, concentrations of total dissolved nitrogen (TDN;

317 ~~(~~Sipler and Bronk, 2015) were determined using either a nitric oxide chemiluminescence  
318 detector connected in series with the HTOCO analyser used for DOC analyses (31% of the  
319 samples), or by employing a UV and/or chemical oxidation step (69%). In the latter  
320 approach, both organic and inorganic N compounds were oxidised to nitrate, which was  
321 subsequently quantified through a colorimetric method to determine the concentration of  
322 inorganic N (Valderrama, 1981; Álvarez-Salgado et al., 2023; Halewood et al., 2022;  
323 Foreman et al., 2019). Another method used for DON determination is oxidizing the  
324 sample and measuring the resulting total nitrate by the nitric oxide chemiluminescence  
325 method (Knapp et al., 2005). However, none of the concentration measurements included  
326 in CoastDOM v1 applied this method. The reported DON concentrations were calculated  
327 as the difference between TDN and dissolved inorganic nitrogen (DIN; sum of ammonium  
328 ( $\text{NH}_4^+$ ) and nitrate/nitrite ( $\text{NO}_3^- + \text{NO}_2^-$ );  $\text{DON} = \text{TDN} - \text{DIN}$ ) (Álvarez-Salgado et al., 2023).  
329 Analyses of total dissolved phosphorus (TDP) were determined by UV (4%) or wet  
330 chemical oxidation (66%), or a combination of these (30%), and subsequently were  
331 analysed for inorganic phosphorus by a colorimetric method (Álvarez-Salgado et al.,  
332 2023). Another method also previously used for TDP analysis is the ash/hydrolysis  
333 method (Solorzano and Sharp, 1980), even though none of the data included in  
334 CoastDOM v1 used this method. The DOP concentrations were calculated as the  
335 difference between TDP and soluble reactive phosphorus (SRP:  $\text{HPO}_4^{2-}$ ) ( $\text{DOP} = \text{TDP} -$   
336  $\text{SRP}$ ) (Álvarez-Salgado et al., 2023).

Formatted: Font: English (United States)

337

### 338 3. Description of the dataset

339 The data compiled in CoastDOM v1 were collected, analysed and processed by different  
340 laboratories, however, all data included have undergone quality control measures, either  
341 by using reference samples or internal quality assurance procedures. While many of the  
342 included DOC and TDN data have been systematically compared against consensus

343 reference material (CRM) mainly provided by the University of Miami's CRM program  
344 (Hansell, 2005), there is a limitation in CoastDOM v1 regarding the intercalibration across  
345 different measurement systems used for both DOP and DON determination. While the  
346 CRM could be used for DOC, DON and DOP measurements, this has not yet been  
347 attempted for DOP and measurement uncertainties increase in the sequence DOC >  
348 DON > DOP. Although some of the reported measurements have quantified the DOP  
349 recovery based on commercially available DOP compounds such as Adenosine  
350 triphosphate (ATP), it is not known if these were conducted systematically in all cases.

351 Therefore, we strongly recommend undertaking further intercalibrations across  
352 laboratories for future measurements of TDP, as has been done for DOC and TDN  
353 measurements (e.g., Sharp et al., 2002). Since additional quality control is not possible  
354 in retrospect, we assessed the quality of CoastDOM v1 based on its internal consistency.

355 In CoastDOM v1, we defined "coastal water" as encompassing estuaries (salinity >  
356 0.1) to the continental shelf break (water depth < 200 m). However, some locations, such  
357 as deep fjords which are close to the coast cannot be classed as coastal due to  
358 bathymetry (deeper than > 200 m). Therefore, we evaluated the inclusion of some  
359 datasets on a case-by-case basis. For inclusion in the database, each DOM  
360 measurement needed at a minimum to contain the following information (if reported in the  
361 original publication or otherwise available):

362

- 363 - Country where samples were collected
- 364 - Latitude of measurement (in decimal units)
- 365 - Longitude of measurement (in decimal units)
- 366 - Year of sampling
- 367 - Month of sampling
- 368 - Sampling day (when available)



- 369 - Depth (m) at which the discrete samples were collected
- 370 - Temperature (°C) of the sample
- 371 - Salinity of the sample
- 372 - Dissolved organic carbon (DOC) concentration ( $\mu\text{mol L}^{-1}$ )
- 373 - Method used to measure DOC concentration
- 374 - DOC - QA flag: Quality flag for DOC measurement
- 375 - Dissolved organic nitrogen (DON) concentration ( $\mu\text{mol L}^{-1}$ )
- 376 - Total dissolved nitrogen (TDN) concentration ( $\mu\text{mol L}^{-1}$ )
- 377 - Method used to measure TDN concentration
- 378 - TDN - QA flag: Quality flag for TDN measurement
- 379 - Dissolved organic phosphorus (DOP) concentration ( $\mu\text{mol L}^{-1}$ )
- 380 - Total dissolved phosphorus (TDP) concentration ( $\mu\text{mol L}^{-1}$ )
- 381 - Method used to measure TDP concentration
- 382 - TDP - QA flag: Quality flag for TDP measurement
- 383 - Responsible person
- 384 - Originator institution
- 385 - Contact of data originator

386

387 It should be noted that in all entries, at least DOC, DON or DOP should have been

388 measured. In addition, we also included other relevant data, when available, in the

389 CoastDOM v1 dataset:

- 390
- 391 - Depth at the station where the sample was collected (Bottom depth, m).
- 392 - Total suspended solids (TSS) concentration ( $\text{mg L}^{-1}$ )
- 393 - Chlorophyll-a (Chl a) concentration ( $\mu\text{g L}^{-1}$ )
- 394 - Chl a - QA flag: Quality flag for chlorophyll-a measurement

- 395 - Sum of nitrate and nitrite ( $\text{NO}_3^- + \text{NO}_2^-$ ) concentration ( $\mu\text{mol L}^{-1}$ )
- 396 -  $\text{NO}_3^- + \text{NO}_2^-$  - QA flag: Quality flag for  $\text{NO}_3^- + \text{NO}_2^-$  measurement
- 397 - Ammonium ( $\text{NH}_4^+$ ) concentration ( $\mu\text{mol L}^{-1}$ )
- 398 -  $\text{NH}_4^+$  - QA flag: Quality flag for  $\text{NH}_4^+$  measurement
- 399 - Soluble reactive phosphorus ( $\text{HPO}_4^{2-}$ ) concentration ( $\mu\text{mol L}^{-1}$ )
- 400 -  $\text{HPO}_4^{2-}$  - QA flag: Quality flag for  $\text{HPO}_4^{2-}$  measurement
- 401 - Particulate organic carbon (POC) concentration ( $\mu\text{mol L}^{-1}$ )
- 402 - Method used to measure POC concentration
- 403 - POC - QA flag: Quality flag for POC measurement
- 404 - Particulate nitrogen (PN) concentration ( $\mu\text{mol L}^{-1}$ )
- 405 - Method used to measure PN concentration
- 406 - PN - QA flag: Quality flag for PN measurement
- 407 - Particulate phosphorus (PP) concentration ( $\mu\text{mol L}^{-1}$ )
- 408 - Method used to measure PP concentration
- 409 - PP - QA flag: Quality flag for PP measurement
- 410 - Dissolved inorganic carbon (DIC) concentration ( $\mu\text{mol kg}^{-1}$ )
- 411 - DIC - QA flag: Quality flag for DIC measurement
- 412 - Total alkalinity (TA) concentration ( $\mu\text{mol kg}^{-1}$ )
- 413 - TA - QA flag: Quality flag for TA measurement

414

415 Quality control of large datasets is crucial to ensure their reliability and usefulness.

416 Thus, we have not included data that were deemed compromised, such as records that  
 417 had not gone through quality control by the data originators. We also accepted a certain  
 418 degree of measurement error since multiple groups have been involved in the collection,  
 419 analysis, and/or compilation of the information. Some of these errors were corrected (e.g.,  
 420 when a value was placed in a wrong column, or clearly inaccurate locations were

421 reallocated for consistency with the place of study), while others could not be rectified  
422 (e.g., values showing clear signs of contamination) and were consequently excluded from  
423 CoastDOM v1 (Fig. 1). It should also be noted that differences in analytical capabilities  
424 between laboratories and individual measurement campaigns likely caused additional  
425 uncertainty. Outliers, arising for example from contamination, were removed from the  
426 dataset. The data were moreover screened for zero values (i.e., concentrations below the  
427 detection limit or absence of data). In cases where concentrations were below the  
428 detection limit, the zero values were replaced with half the value of the limit-of-detection.

429 Commonly reported detection limits are reach  $-4 \mu\text{mol L}^{-1}$  for DOC,  $\rightarrow 0.3 \mu\text{mol L}^{-1}$  for  
430 DON and are  $\sim 0.03 \mu\text{mol L}^{-1}$  for DOP.

431 To ensure the inclusion of only high-quality data, we only accepted entries with specific  
432 World Ocean Circulation Experiment (WOCE) quality codes: “2- Acceptable  
433 measurement” and “6- Mean of replicate measurements”. In our quality control  
434 assessments, we carefully avoided overly strict criteria, known as “data grooming”, which  
435 could potentially overlook genuine patterns and changes in the dataset that may be  
436 significant over longer temporal and/or wider spatial scales. Coastal waters are known to  
437 exhibit a wide range of environmental concentrations, influenced by factors such as  
438 seasonality and local anthropogenic activities. Consequently, these data points may  
439 encompass a wide concentration range. However, obtaining consistent long-term  
440 datasets is important to enable data intercomparison, and establish a robust baseline.  
441 Such long-term consistency can be achieved by using the CRM standards provided by  
442 the Hansell laboratory for DOC and TDN. Another helpful approach is comparing the  
443 DOM concentrations obtained by different laboratories in the same study area and time  
444 of year.

445  
446 **3.1 Summary of dissolved organic carbon (DOC) concentration observations**

447 Measurements of DOC concentrations were conducted between 1978 to 2022, with a  
448 total of 62339 individual data points (Table 1). The DOC concentrations ranged from 17  
449 to 30327  $\mu\text{mol C L}^{-1}$  (average  ~~$\pm$~~ (Standard Deviation;  ~~$\pm$~~ (SD): 182  ~~$\pm$~~ (314)  $\mu\text{mol C L}^{-1}$ ;  
450 median: 103  $\mu\text{mol C L}^{-1}$ ; Table 1). The majority (53%) of the concentrations fell within the  
451 range of 60 to 120  $\mu\text{mol C L}^{-1}$  (Fig. 24). A large number of DOC concentration  
452 observations (17%) ranged between 300 and 600  $\mu\text{mol C L}^{-1}$ , which were predominantly  
453 collected in eutrophic and river-influenced coastal waters of the Northern Hemisphere,  
454 such as the Baltic Sea (Fig. 24). It was observed that 75% of the DOC concentrations  
455 were higher than 77  $\mu\text{mol C L}^{-1}$ , while 25% of the measurements surpassed 228  $\mu\text{mol C}$   
456  $\text{L}^{-1}$  (Table 1).

457 Coastal environments that experience minimal continental runoff, such as Palmer  
458 Station in Antarctica, typically exhibit low DOC concentrations. On the other hand, coastal  
459 waters heavily influenced by humic-rich terrigenous inputs, such as the Sarawak region  
460 in Malaysia, tended to have high DOC concentrations. In addition, some extremely high  
461 DOC concentrations were measured in the Derwent River in Australia which is impacted  
462 by paper mill effluents. There has been a large increase in the number of DOC  
463 concentration observations after 1992 (Fig. 32), and those measurements were from a  
464 wide range of locations. However, these concentration observations were not evenly  
465 distributed around the globe, with the Southern Hemisphere being ~~relatively~~ under-  
466 sampled (10% of observations), especially in the African, South American and Antarctic  
467 continents (Fig. 32, 43).

468

### 469 3.2. Summary of dissolved organic nitrogen (DON) concentration observations

470 The DON concentration measurements were collected between 1990 and 2021, with  
471 a total of 20357 data points (Table 1). Concentrations of DON ranged from < 0.1 to 2095.3  
472  $\mu\text{mol N L}^{-1}$  (average  ~~$\pm$~~ (SD): 13.6  ~~$\pm$~~ (30.4)  $\mu\text{mol N L}^{-1}$ ; median: 8.0  $\mu\text{mol N L}^{-1}$ ; Table 1),

473 with the most common range (42%) for DON concentrations between 4 to 8  $\mu\text{mol N L}^{-1}$   
474 (Fig. 42). Overall, 75% of DON concentrations were above 5.5  $\mu\text{mol N L}^{-1}$ , while 25%  
475 were above 15.8  $\mu\text{mol N L}^{-1}$  (Table 1).

476 The lowest DON concentrations were recorded in Young Sound, Greenland, which  
477 receives direct run-off from the Greenland Ice Sheet, whereas the highest concentrations  
478 were detected during a flood event in the Richmond River Estuary, Australia. Since 1995,  
479 there has been a large increase in the number of DON measurements conducted in  
480 coastal waters globally (Fig. 23); however, the majority of those measurements have been  
481 in the Northern Hemisphere (79% of observations), mostly in Europe and the United  
482 States (Figs. 23, 43).

### 484 3.3. Summary of dissolved organic phosphorus (DOP) concentration 485 observations

486 CoastDOM v1 includes a total of 13534 DOP measurements, collected between 1990  
487 and 2021 (Table 1). Overall, DOP concentrations ranged from  $< 0.10$  to  $84.27 \mu\text{mol P L}^{-1}$   
488 (average  $\pm$  (SD):  $0.34 \pm 1.11 \mu\text{mol P L}^{-1}$ ; median:  $0.18 \mu\text{mol P L}^{-1}$ ; Table 2). The  
489 majority (74%) of DOP concentrations were below  $0.30 \mu\text{mol P L}^{-1}$  (Fig. 42). Analysis of  
490 the DOP dataset revealed that 75% of the concentrations were above  $0.11 \mu\text{mol P L}^{-1}$ ,  
491 while 25% were above  $0.30 \mu\text{mol P L}^{-1}$  (Table 1).

492 The lowest DOP concentrations were measured off the Kimberley Coast in Australia,  
493 while the highest concentrations were found in the Vasse-Wonnerup Estuary in the South  
494 west region of Australia. Similarly to DOC and DON, most of the DOP measurements  
495 have been conducted from the 1990s onwards, with a predominant focus in the Northern  
496 Hemisphere (70% of observations), particularly in Europe and the United States (Figs.  
497 32, 43).

#### 3.4. Summary of dissolved organic matter (DOM) concentration observations

In CoastDOM v1 the number of measurements decreases progressively in the sequence DOC > DON > DOP (62339, 20357, and 13534, respectively), reflecting both differences in the maturity of the analytical methods and the greater focus on carbon cycling by the aquatic science community. In addition, the average DOC concentration in coastal waters ( $182 \pm 314$   $\mu\text{mol C L}^{-1}$ ), was 13-fold ~~great~~higher than the average coastal DON concentrations  $13.6 \pm 30.4$   $\mu\text{mol N L}^{-1}$ ), which was itself 39-fold higher than the average coastal DOP concentrations ( $0.34 \pm 1.11$ )  $\mu\text{mol P L}^{-1}$ ) (Table 1). Interestingly the coefficient of variation (C.V. - dispersion of the data around the mean) increased from DOC (173%) to DON (224%) and DOP (326%), which is related to the fact that the % contribution of refractory organic material decreases in the same sequence (Table 1). It should be noted that CoastDOM v1 only contains 7058 paired measurements of DOC, DON, and DOP, and therefore only a subset of observations reported all three element pools. The average C: N: P stoichiometry for these paired DOM measurements was 1171 ( $\pm 4248$ ): 100 ( $\pm 580$ ): 1 (Table 1), which was very N- and P- depleted compared to the Redfield Ratio (Redfield et al., 1963). -However, the large variations in C:N, C:P and N:P ratios reveals large variations in the composition of the DOM pool in coastal waters.

#### 3.5. Potential use of the dataset

The use of the CoastDOM v1 dataset should be accompanied by the citation of this paper and the inclusion of the correct doi-reference. CoastDOM v1 is available in full open access on the PANGEA homepage ~~after acceptance of the manuscript, where it will be available~~ as a \*.csv file. The dataset includes a brief description of the metadata and methods employed, with emphasis on measurement techniques and data units. We chose the terminology most familiar to the ocean science community. It is important to note that all data included in CoastDOM v1, as well as this manuscript, are considered

public domain; as such, a subset of this global dataset ~~is may~~ also ~~available be present~~ in previous data compilations (e.g., Hansell et al., 2021). The list of citations and links referenced in CoastDOM v1 also provide users with information ~~as to on~~ how these data ~~have~~ been previously used in publications or databases.

### 3.6. Recommendations and conclusions

In CoastDOM v1, we have compiled available coastal DOM data in a single repository, making it openly and freely available to the research community. This compilation has established a consistent global dataset, serving as a valuable information source to investigate a variety of environmental questions and to explore spatial and temporal trends. We suggest a set of recommendations for the future expansion of this global dataset. ~~Firstly,~~ our analysis highlights a spatial bias, with a concentration of sampling efforts and/or data availability predominantly concentrated in the Northern Hemisphere. The data gap in coastal DOM measurements in the Southern Hemisphere needs to be addressed to provide a more representative global understanding of the role of DOM in coastal water biogeochemistry. Additionally, increased sampling efforts especially around ~~in the African and South American,~~ and island nations ~~-continents~~ are warranted due to the vulnerability of many coastal areas to climate change and intensifying human activities, which will undoubtedly impact DOM biogeochemistry. Further more, ~~it is also worth noting that~~ there are is comparatively few data from coastal waters affected by river discharge into the tropics, e.g., the Amazon, and Indian and Indonesian rivers that together dominate freshwater inputs to the coastal ocean. ~~Secondly,~~ there is a need for more comprehensive temporal and spatial datasets to capture the variability of DOM ~~concentrations levels~~ in highly dynamic and productive coastal systems. Focused efforts should be made to resolve these temporal and spatial changes. Third, only a fraction of data entries report paired DOC, DON and DOP measurements, we encourage that these

551 be measured and reported together in order to better determine changes in stoichiometry  
552 and composition. Fourth~~Thirdly, it is also important to collect~~ing and reporting ancillary  
553 data, such as temperature, salinity, nutrient measurements, and particulate components,  
554 is important to provide context and better understand the underlying processes driving  
555 the observed DOM concentrationslevels. Fifth, studies need to collect a minimum of  
556 metadata and report it in standardized manner. Lastly, we ~~strongly~~ recommend ~~that the~~  
557 ~~DOM research community conducts~~ regular inter-calibration exercises to establish  
558 standardised and interoperable methods and data, particularly for DON and DOP  
559 measurements. This will ensure the comparability and reliability of data across different  
560 studies and enhance our understanding of DON and DOP dynamics in coastal waters.

561 In light of ongoing global environmental changes, the mobilisation and open sharing of  
562 existing data ~~of~~for important biogeochemical variables, such as the DOM pool, are crucial  
563 for establishing baselines and determining global trends and changes in coastal waters.  
564 The aim is to publish an updated version of the database periodically to determine global  
565 trends of DOM levels in coastal waters, and we therefore encourage researchers to  
566 submit new data to the corresponding author. The CoastDOM v1 dataset was developed  
567 according to the FAIR principles regarding Findability, Accessibility, Interoperability and  
568 Reusability of data. Thus, CoastDOM v1 will serve as a reliable open-source information  
569 resource, enabling in-depth analyses and providing quality-controlled input data for large  
570 -scale ecosystem models.

#### 572 4. Data availability

573 ~~The dataset is available for the review process at Figshare~~  
574 ~~<https://figshare.com/s/512289eb43c4f8e8eae0f>.~~The dataset is available at furthermore  
575 submitted to the PANGEA database  
576 (<https://doi.pangaea.de/10.1594/PANGAEA.964012>; and is currently waiting to be



577 ~~assigned a Doi number~~ (Lønborg et al., 2023). The file ~~is will be~~ available as a \*.csv  
578 merged file and ~~is will be~~ available in full open access ~~in the PANGAEA database after~~  
579 ~~acceptance of the manuscript~~.

Commented [CL1]: update

### 581 **Competing interests**

582 The authors declare no competing interests.

### 583 **Author Contribution**

584 C.L., C.C., and X.A.A-S started the initiative and finalised the data compilation. All co-  
585 authors contributed data. C.L. wrote the manuscript with input from all co-authors.

### 586 **Acknowledgement**

587 Qi Chen is acknowledged for his very skilful help with Figure ~~43~~.

### 588 **Funding**

589 During the drafting of the manuscript C.L. received funding from the Independent  
590 Research Fund Denmark Grant No. 1127-00033B. The monitoring data obtained from  
591 Bermuda received funding from the Bermuda Government Department of Environment  
592 and Natural Resources. A subset of the data obtained from UK coastal estuaries received  
593 funding from the Natural Environment Research Council (Grant NE/N018087/1). Data  
594 retrieved from the Palmer LTER data were collected with support from the Office of Polar  
595 Programs, US National Science Foundation. Data obtained from the Great Barrier Reef  
596 Marine Monitoring Program for Inshore Water Quality, which is a partnership between the  
597 Great Barrier Reef Marine Park Authority, the Australian Institute of Marine Science,  
598 James Cook University, and the Cape York Water Partnership. The contribution by P.K.  
599 was supported by DiSeDOM project contract no. UMO-2019/33/B/ST10/01232 funded by  
600 the NCN - National Science Centre, Poland. N.W. and A.M.-P. participated in this

601 synthesis effort with funding provided by the U.S. Department of Energy funded  
602 COMPASS-FME project; the provided data was collected with funding from the PREMIS  
603 Initiative, conducted under the Laboratory Directed Research and Development Program  
604 at Pacific Northwest National Laboratory. The data obtained from the Levantine Sea (Med  
605 Sea) received funding from the Scientific and Technological Research Council of Türkiye  
606 (TÜBİTAK, 1001 program, Grant 115Y629). The data obtained from Gulf of Trieste  
607 (Slovenian waters) were financed by Research Program No. P1-0237 (Slovenian  
608 Research and Innovation Agency). Data obtained from the northern Baltic Sea were  
609 financed by the research program EcoChange (Swedish research council FORMAS). The  
610 contribution by D.H. was supported by National Natural Science Foundation of China  
611 (42222061), and funding support from the Center for Ocean Research in Hong Kong and  
612 Macau (CORE). CORE is a joint research center for ocean research between Laoshan  
613 Laboratory and HKUST. The contribution by Y.S. was supported by National Natural  
614 Science Foundation of China (42106040), the Fundamental Research Funds for the  
615 Central Universities of China (20720210076), and Fujian Provincial Central Guided Local  
616 Science and Technology Development Special Project (Grant No. 2022L3078). The data  
617 provided by LCCJr were supported by the Brazilian National Council of Research and  
618 Development (CNPq-Pve No. 401.726/2012-6) and by the Carlos Chagas Foundation for  
619 Research Support of the State of Rio de Janeiro (FAPERJ; No. E-26202.785/2016). Data  
620 provided by SC were collected in the framework of Italian (PRISMA 1 and 2, ANOCSIA  
621 and VECTOR) and European (OCEANCERTAIN) research projects. Data provided by  
622 MG were collected within the Project “Mucilages in the Adriatic and Tyrrhenian Seas  
623 (MAT)”, coordinated by the Istituto Centrale per la Ricerca Scientifica e Tecnologica  
624 Applicata al Mare and financially supported by the Italian Ministry of the Environment.  
625 Data obtained from the Georgia coast (USA) were supported by the National Science  
626 Foundation through grants OCE-1832178 (GCE-LTER Program) and OCE-1902131.

627 [Observations in the southern Caribbean Sea including the Cariaco Basin were collected](#)  
628 [as part of the CARIACO Ocean Time Series program \(supported by the Consejo Nacional](#)  
629 [de Ciencia y Tecnología of Venezuela, the Ley de Ciencia, Tecnología e Innovación de](#)  
630 [Venezuela, the Estación de Investigaciones Marinas de Venezuela; the National Science](#)  
631 [Foundation grants OCE-0752139, OCE-9216626, OCE-9729284, OCE-491 9401537,](#)  
632 [OCE-9729697, OCE-9415790, OCE-9711318, OCE-0326268, OCE-0963028, OCE-](#)  
633 [0326313, and OCE-0326268, NASA grants NAG5-6448, NAS5-97128, and](#)  
634 [NNX14AP62A; the Inter-American Institute for Global Change Research grant IAI-](#)  
635 [CRN3094\), and the Marine Biodiversity Observation Network/MBON of the Group on](#)  
636 [Earth Observations Biodiversity Observation Network\). Data provided by D.J.R. and](#)  
637 [B.D.E. was supported by ARC Linkage \(LP0770222\), with Norske-Skog Boyer and the](#)  
638 [Derwent Estuary Program providing financial and in-kind assistance.](#)

#### 640 **References**

- 641 Álvarez-Salgado, X. A., Nieto-Cid, M., and Rossel, P. E.: Dissolved Organic Matter, in:  
642 Marine Analytical Chemistry, edited by: Blasco, J., and Tovar-Sánchez, A., Springer  
643 International Publishing, Cham, 39-102, 10.1007/978-3-031-14486-8\_2, 2023.
- 644 Bauer, J. E., Cai, W. J., Raymond, P. A., Bianchi, T. S., Hopkinson, C. S., and Regnier,  
645 P. A.: The changing carbon cycle of the coastal ocean, Nature, 504, 61-70,  
646 10.1038/nature12857, 2013.
- 647 Benner, R. and Amon, R. M.: The size-reactivity continuum of major bioelements in the  
648 ocean, Annual review of marine science, 7, 185-205, 10.1146/annurev-marine-  
649 010213-135126, 2015.
- 650 Boudreau, B. P. and Ruddick, B. R.: On a reactive continuum representation of organic  
651 matter diagenesis, American Journal of Science, 291, 507-538, 1991.
- 652 Burdige, D. J. and Komada, T.: Sediment pore waters, in: Biogeochemistry of marine  
653 dissolved organic matter, edited by: Hansen, D. A., and Carlson, C. A., Elsevier, 535-  
654 577, 2014.
- 655 Carlson, C. A. and Hansell, D. A.: DOM Sources, Sinks, Reactivity, and Budgets, in:  
656 Biogeochemistry of Marine Dissolved Organic Matter, edited by: Carlson, C. A., and  
657 Hansell, D. A., Elsevier Science & Technology, 65-126, 10.1016/b978-0-12-405940-  
658 5.00003-0, 2015.
- 659 Carreira, C., Talbot, S., and Lønborg, C.: Bacterial consumption of total and dissolved  
660 organic carbon in the Great Barrier Reef, Biogeochemistry, 10.1007/s10533-021-  
661 00802-x, 2021.
- 662 Cauwet, G.: DOM in coastal areas, in: Biogeochemistry of Dissolved organic matter,  
663 edited by: Hansell, D., and Carlson, C. A., Academic Press, London, 579-609, 2002.

665 Chin, W. C., Orellana, M. V., and Verdugo, P.: Spontaneous assembly of marine  
666 dissolved organic matter into polymer gels, *Nature*, 391, 568-572, 1998.

667 Foreman, R. K., Björkman, K. M., Carlson, C. A., Opalk, K., and Karl, D. M.: Improved  
668 ultraviolet photo-oxidation system yields estimates for deep-sea dissolved organic  
669 nitrogen and phosphorus, *Limnology and Oceanography: Methods*, 17, 277-291,  
670 <https://doi.org/10.1002/lom3.10312>, 2019.

671 García-Martín, E. E., Sanders, R., Evans, C. D., Kitidis, V., Lapworth, D. J., Rees, A. P.,  
672 Spears, B. M., Tye, A., Williamson, J. L., Balfour, C., Best, M., Bowes, M., Breimann,  
673 S., Brown, I. J., Burden, A., Callaghan, N., Felgate, S. L., Fishwick, J., Fraser, M.,  
674 Gibb, S. W., Gilbert, P. J., Godsell, N., Gomez-Castillo, A. P., Hargreaves, G., Jones,  
675 O., Kennedy, P., Lichtschlag, A., Martin, A., May, R., Mawji, E., Mounteney, I.,  
676 Nightingale, P. D., Olszewska, J. P., Painter, S. C., Pearce, C. R., Pereira, M. G.,  
677 Peel, K., Pickard, A., Stephens, J. A., Stinchcombe, M., Williams, P., Woodward, E.  
678 M. S., Yarrow, D., and Mayor, D. J.: Contrasting Estuarine Processing of Dissolved  
679 Organic Matter Derived From Natural and Human-Impacted Landscapes, *Global  
680 Biogeochemical Cycles*, 35, e2021GB007023,  
681 <https://doi.org/10.1029/2021GB007023>, 2021.

682 Halewood, E., Opalk, K., Custals, L., Carey, M., Hansell, D. A., and Carlson, C. A.:  
683 Determination of dissolved organic carbon and total dissolved nitrogen in seawater  
684 using High Temperature Combustion Analysis, *Frontiers in Marine Science*, 9,  
685 10.3389/fmars.2022.1061646, 2022.

686 Hansell, D. A.: Dissolved Organic Carbon Reference Material Program, *Eos,  
687 Transactions American Geophysical Union*, 86, 318-318,  
688 <https://doi.org/10.1029/2005EO350003>, 2005.

689 Hansell, D. A., Carlson, C. A., Amon, R. M. W., Álvarez-Salgado, X. A., Yamashita, Y.,  
690 Romera-Castillo, C., and Bif, M. B.: Compilation of dissolved organic matter (DOM)  
691 data obtained from global ocean observations from 1994 to 2021. Version 2. (NCEI  
692 Accession 0227166) [dataset], [doi.org/10.25921/s4f4-ye35](https://doi.org/10.25921/s4f4-ye35), 2021.

693 Iavorivska, L., Boyer, E. W., and DeWalle, D. R.: Atmospheric deposition of organic  
694 carbon via precipitation, *Atmospheric Environment*, 146, 153-163,  
695 <https://doi.org/10.1016/j.atmosenv.2016.06.006>, 2016.

696 Karl, D. M. and Björkman, K. M.: Dynamics of Dissolved Organic Phosphorus, in:  
697 *Biogeochemistry of marine dissolved organic matter*, edited by: Hansell, D. A., and  
698 Carlson, C. A., 233-334, 10.1016/b978-0-12-405940-5.00005-4, 2015.

699 Kerner, M., Hohenberg, H., Ertl, S., Reckermann, M., and Spitzky, A.: Self-organization  
700 of dissolved organic matter to micelle-like microparticles in river water, *Nature*, 422,  
701 150-154, 2003.

702 Knapp, A. N., Sigman, D. M., and Lipschultz, F.: N isotopic composition of dissolved  
703 organic nitrogen and nitrate at the Bermuda Atlantic Time-series Study site, *Global  
704 Biogeochemical Cycles*, 19, <https://doi.org/10.1029/2004GB002320>, 2005.

705 Laruelle, G. G., Dürr, H. H., Lauerwald, R., Hartmann, J., Slomp, C. P., Goossens, N.,  
706 and Regnier, P. A. G.: Global multi-scale segmentation of continental and coastal  
707 waters from the watersheds to the continental margins, *Hydrol. Earth Syst. Sci.*, 17,  
708 2029-2051, 10.5194/hess-17-2029-2013, 2013.

709 Laurenceau-Cornec, E. C., Trull, T. W., Davies, D. M., De La Rocha, C. L., and Blain,  
710 S.: Phytoplankton morphology controls on marine snow sinking velocity, *Marine  
711 Ecology Progress Series*, 520, 35-56, 2015.

712 Liang, Z., McCabe, K., Fawcett, S. E., Forrer, H. J., Hashihama, F., Jeandel, C.,  
713 Marconi, D., Planquette, H., Saito, M. A., Sohm, J. A., Thomas, R. K., Letscher, R. T.,  
714 and Knapp, A. N.: A global ocean dissolved organic phosphorus concentration  
715 database (DOPv2021), *Scientific Data*, 9, 772, 10.1038/s41597-022-01873-7, 2022.

716 Lønborg, C. and Álvarez-Salgado, X. A.: Recycling versus export of bioavailable  
717 dissolved organic matter in the coastal ocean and efficiency of the continental shelf  
718 pump, *Global biogeochemical cycles* 26, GB3018, 10.1029/2012GB004353, 2012.

719 Lønborg, C., Álvarez-Salgado, X. A., Davidson, K., and Miller, A. E. J.: Production of  
720 bioavailable and refractory dissolved organic matter by coastal heterotrophic  
721 microbial populations, *Estuarine, Coastal and Shelf science*, 82, 682–688,  
722 10.1016/j.ecss.2009.02.026, 2009.

723 Lønborg, C., Álvarez-Salgado, X. A., Duggan, S., and Carreira, C.: Organic matter  
724 bioavailability in tropical coastal waters: The Great Barrier Reef, *Limnology and  
725 Oceanography*, 63, 1015-1035, 10.1002/lno.10717, 2018.

726 Lønborg, C., Carreira, C., Jickells, T., and Álvarez-Salgado, X. A.: Impacts of Global  
727 Change on Ocean Dissolved Organic Carbon (DOC) Cycling, *Frontiers in Marine  
728 Science*, 7, 466, 10.3389/fmars.2020.00466, 2020.

729 Lønborg, C., Carreira, C., Abril, G., Agustí, S., Amaral, V., Andersson, A., Arístegui, J.,  
730 Bhadury, P., Bif, M. B., Borges, A. V., Bouillon, S., Calleja, M. L., Cotovicz Jr, L. C.,  
731 Cozzi, S., Doval, M. D., Duarte, C. M., Eyre, B. D., Fichot, C. G., García-Martín, E.  
732 E., Garzon-Garcia, A., Giani, M., Gonçalves-Araujo, R., Gruber, R., Hansell, D. A.,  
733 Hashihama, F., He, D., Holding, J. M., Hunter, W. R., Ibánhez, J. S., Ibello, V., Jiang,  
734 S., Kim, G., Klun, K., Kowalczyk, P., Kubo, A., Weng Lee, C., Lopes, C., Maggioni,  
735 F., Magni, P., Marrase, C., Martin, P., McCallister, S. L., McCallum, R., Medeiros, P.  
736 M., Morán, X. A. G., Muller-Karger, F., Myers-Pigg, A., Norli, M., Oakes, J. M.,  
737 Osterholz, H., Park, H., Paulsen, M. L., Rosentreter, J. A., Rueda-Roa, D., Santinelli,  
738 C., Shen, Y., Teira, E., Tinta, T., Uher, G., Wakita, M., Ward, N., Watanabe, K., Xin,  
739 Y., Yamashita, Y., Yang, L., Yeo, J., Yuan, H., Zheng, Q., and Álvarez-Salgado, X.  
740 A.: A global database of dissolved organic matter (DOM) [concentration](#)  
741 measurements in coastal waters (CoastDOM v1) [dataset], 2023.

742 Mackenzie, F. T., De Carlo, E. H., and Lerman, A.: 5.10 - Coupled C, N, P, and O  
743 Biogeochemical Cycling at the Land–Ocean Interface, in: *Treatise on Estuarine and  
744 Coastal Science*, edited by: Wolanski, E., and McLusky, D., Academic Press,  
745 Waltham, 317-342, <https://doi.org/10.1016/B978-0-12-374711-2.00512-X>, 2011.

746 Mopper, K., Kieber, D. J., and Stubbins, A.: Marine Photochemistry of Organic Matter,  
747 in: *Biogeochemistry of Marine Dissolved Organic Matter*, edited by: Carlson, C. A.,  
748 and Hansell, D. A., 389-450, 10.1016/b978-0-12-405940-5.00008-x, 2015.

749 Osterholz, H., Burmeister, C., Busch, S., Dierken, M., Frazão, H. C., Hansen, R.,  
750 Jeschek, J., Kremp, A., Kreuzer, L., and Sadkowiak, B.: Nearshore dissolved and  
751 particulate organic matter dynamics in the southwestern Baltic Sea: environmental  
752 drivers and time series analysis (2010–2020), *Frontiers in Marine Science*, 8,  
753 795028, 2021.

754 Raymond, P. A. and Spencer, R. G. M.: Riverine DOM, in: *Biogeochemistry of Marine  
755 Dissolved Organic Matter*, edited by: Hansell, D. A., and Carlson, C. A., Elsevier,  
756 Amsterdam, 509-533, 10.1016/b978-0-12-405940-5.00011-x, 2015.

757 Redfield, A. C., Ketchum, B. K., and Richards, F. A.: The influence of organisms on the  
758 composition of sea-water, in: *The sea*, vol. 2, The composition of sea water:  
759 Comparative and descriptive oceanography, edited by: Hill, M. N., Wiley-Interscience,  
760 26- 77, 1963.

761 Santos, I. R., Burdige, D. J., Jennerjahn, T. C., Bouillon, S., Cabral, A., Serrano, O.,  
762 Wernberg, T., Filbee-Dexter, K., Guimond, J. A., and Tamborski, J. J.: The  
763 renaissance of Odum's outwelling hypothesis in 'Blue Carbon' science, *Estuarine,  
764 Coastal and Shelf Science*, 255, 10.1016/j.ecss.2021.107361, 2021.

765 Sharp, J. H., Benner, R., Bennett, L., Carlson, C. A., Dow, R., and Fitzwater, S. E.: Re-  
766 evaluation of high temperature combustion and chemical oxidation measurements of

767 dissolved organic carbon in seawater, *Limnology and Oceanography*, 38, 1774-1782,  
768 <https://doi.org/10.4319/lo.1993.38.8.1774>, 1993.  
769 Sharp, J. H., Rinker, K. R., Savidge, K. B., Abell, J., Benaim, J. Y., Bronk, D., Burdige,  
770 D. J., Cauwet, G., Chen, W., Doval, M. D., Hansell, D., Hopkinson, C., Kattner, G.,  
771 Kaumeyer, N., McGlathery, K. J., Merriam, J., Morley, N., Nagel, K., Ogawa, H.,  
772 Pollard, C., Pujo-Pay, M., Raimbault, P., Sambrotto, R., Seitzinger, S., Spyres, G.,  
773 Tirendi, F., Walsh, T. W., and Wong, C. S.: A preliminary methods comparison for  
774 measurement of dissolved organic nitrogen in seawater, *Marine Chemistry*, 78, 171-  
775 184, 2002.  
776 Sipler, R. E. and Bronk, D. A.: Dynamics of Dissolved Organic Nitrogen, in:  
777 *Biogeochemistry of Marine Dissolved Organic Matter*, edited by: Hansell, D. A., and  
778 Carlson, C. A., 127-232, 10.1016/b978-0-12-405940-5.00004-2, 2015.  
779 Solorzano, L. and Sharp, J. H.: Determination of total dissolved phosphorus and  
780 particulate phosphorus in natural waters, *Limnology and Oceanography*, 25, 754-  
781 758, 1980.  
782 Taniguchi, M., Dulai, H., Burnett, K. M., Santos, I. R., Sugimoto, R., Stieglitz, T., Kim,  
783 G., Moosdorf, N., and Burnett, W. C.: Submarine Groundwater Discharge: Updates  
784 on Its Measurement Techniques, Geophysical Drivers, Magnitudes, and Effects,  
785 *Frontiers in Environmental Science*, 7, 10.3389/fenvs.2019.00141, 2019.  
786 Valderrama, J. C.: The simultaneous analysis of total nitrogen and total phosphorus in  
787 natural waters, *Marine Chemistry*, 10, 109-122, 1981.  
788 Wada, S., Aoki, M. N., Mikami, A., Komatsu, T., Tsuchiya, Y., Sato, T., Shinagawa, H.,  
789 and Hama, T.: Bioavailability of macroalgal dissolved organic matter in seawater,  
790 *Marine Ecology Progress Series*, 370, 33-44, 2008

791

792 **Figure legends**

793 **Figure 1.** Flow diagram of data collation, quality control and inclusion into CoastDOM v1  
794 database.

795 **Figure 24.** Histograms showing the distribution of observations for **a)** dissolved organic  
796 carbon (DOC), **b)** nitrogen (DON) and **c)** phosphorus (DOP), within defined  
797 concentration ranges in the coastal ocean. Note that the concentration ranges are not  
798 uniform in all cases due to the large difference in concentrations<sub>s</sub> levels.

799 **Figure 23.** **a)** Cumulative number of concentration observations for dissolved organic  
800 carbon (DOC), nitrogen (DON), and phosphorus (DOP). Number of concentration  
801 observations shown as a function of **b) sampling month** (“N.S” are samples for which  
802 the sampling month is not specified), **cb)** latitude, and **de)** longitude, grouped into bins  
803 of 10° latitude or longitude.

804 **Figure 34.** Global distribution of concentration observations included in CoastDOM v1 for  
805 **a)** dissolved organic carbon (DOC), **b)** nitrogen (DON), and **c)** phosphorus (DOP). The  
806 black dots on the map represent the reported data that are included in the CoastDOM  
807 v1 database. Histograms show the distribution of observations for DOC, DON and DOP  
808 within defined concentration ranges in the continents where measurements are  
809 available. Maps were created using the GIS shape file obtained from Laurelle et al.  
810 (Laruelle et al., 2013)

811 **Table 1.** Descriptive statistics for the dissolved organic carbon (DOC), dissolved organic  
 812 nitrogen (DON), and dissolved organic phosphorus (DOP) concentration observations  
 813 measurements included in the CoastDOM v1 dataset. The DOC:DON, DOC:DOP and  
 814 DON:DOP ratios are also reported. The minimum (Min), maximum (Max), average values  
 815 (Avg.) and standard deviation (SD), coefficient of variation (CV %), median, 25th and 75th  
 816 percentiles (perc.) and number of samples (N) for each variable are shown.

|            | <b>DOC</b>                                 | <b>DON</b>                                 | <b>DOP</b>                                 |  |  |  |
|------------|--------------------------------------------|--------------------------------------------|--------------------------------------------|--|--|--|
|            | <b><math>\mu\text{mol C L}^{-1}</math></b> | <b><math>\mu\text{mol N L}^{-1}</math></b> | <b><math>\mu\text{mol P L}^{-1}</math></b> |  |  |  |
| Min        | 17                                         | <0.1                                       | <0.01                                      |  |  |  |
| Max        | 30327                                      | 2095.3                                     | 84.27                                      |  |  |  |
| Avg. (SD)  | 182 (314)                                  | 13.6 (30.4)                                | 0.34 (1.11)                                |  |  |  |
| Median     | 103                                        | 8.0                                        | 0.18                                       |  |  |  |
| CV %       | 173                                        | 224                                        | 326                                        |  |  |  |
| 25th perc. | 77                                         | 5.5                                        | 0.11                                       |  |  |  |
| 75th perc. | 228                                        | 15.8                                       | 0.30                                       |  |  |  |
| N          | 62339                                      | 20357                                      | 13534                                      |  |  |  |

  

|               | <b>DOC</b>                               | <b>DON</b>                               | <b>DOP</b>                               | <b>DOC:DON</b> | <b>DOC:DOP</b>  | <b>DON:DOP</b> |
|---------------|------------------------------------------|------------------------------------------|------------------------------------------|----------------|-----------------|----------------|
|               | <b><math>\mu\text{mol L}^{-1}</math></b> | <b><math>\mu\text{mol L}^{-1}</math></b> | <b><math>\mu\text{mol L}^{-1}</math></b> |                |                 |                |
| Min           | 17                                       | <0.1                                     | <0.01                                    | 1              | 18              | 0.14           |
| Max           | 30327                                    | 2095.3                                   | 84.27                                    | 3046           | 248024          | 8894           |
| Avg. $\pm$ SD | 182 $\pm$ 314                            | 13.6 $\pm$ 30.4                          | 0.34 $\pm$ 1.11                          | 18 $\pm$ 43    | 1171 $\pm$ 4248 | 100 $\pm$ 580  |
| Median        | 103                                      | 8.0                                      | 0.18                                     | 14             | 583             | 47             |
| CV            | 173                                      | 224                                      | 324                                      | 244            | 363             | 578            |
| 25%iles       | 77                                       | 5.5                                      | 0.11                                     | 11             | 401             | 30             |
| 75%iles       | 228                                      | 15.8                                     | 0.30                                     | 18             | 1034            | 78             |
| N             | 62339                                    | 20357                                    | 13534                                    | 12632          | 7415            | 12954          |

817



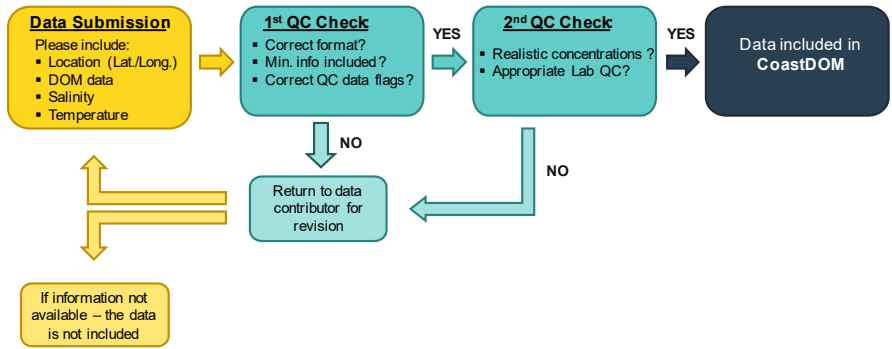

§18

§19

**Figure 1.**

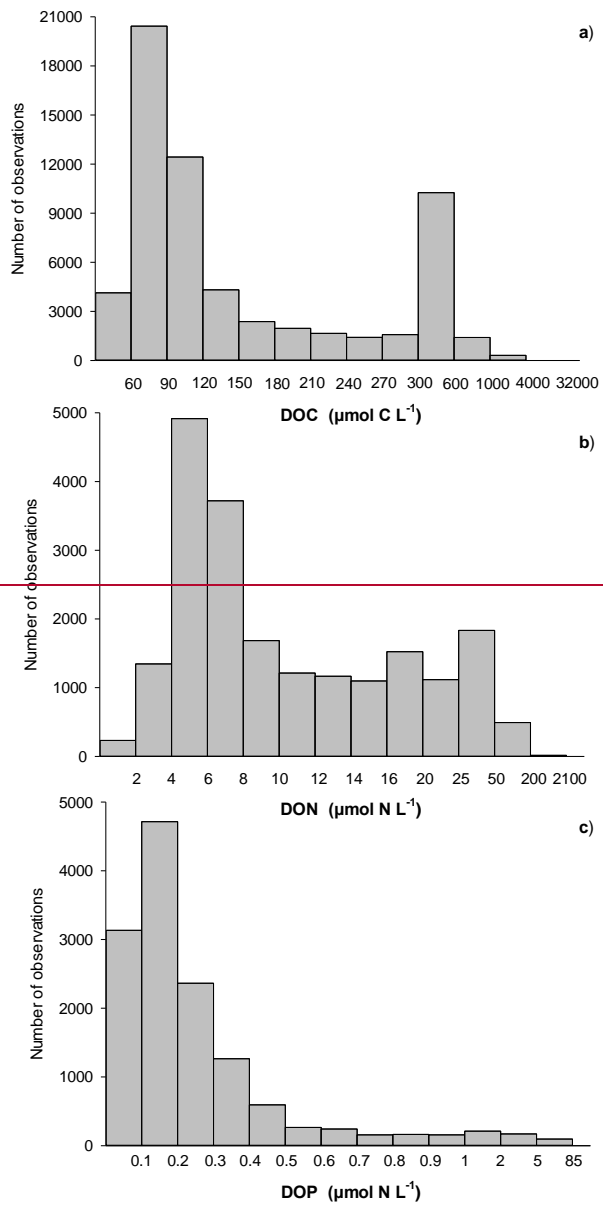

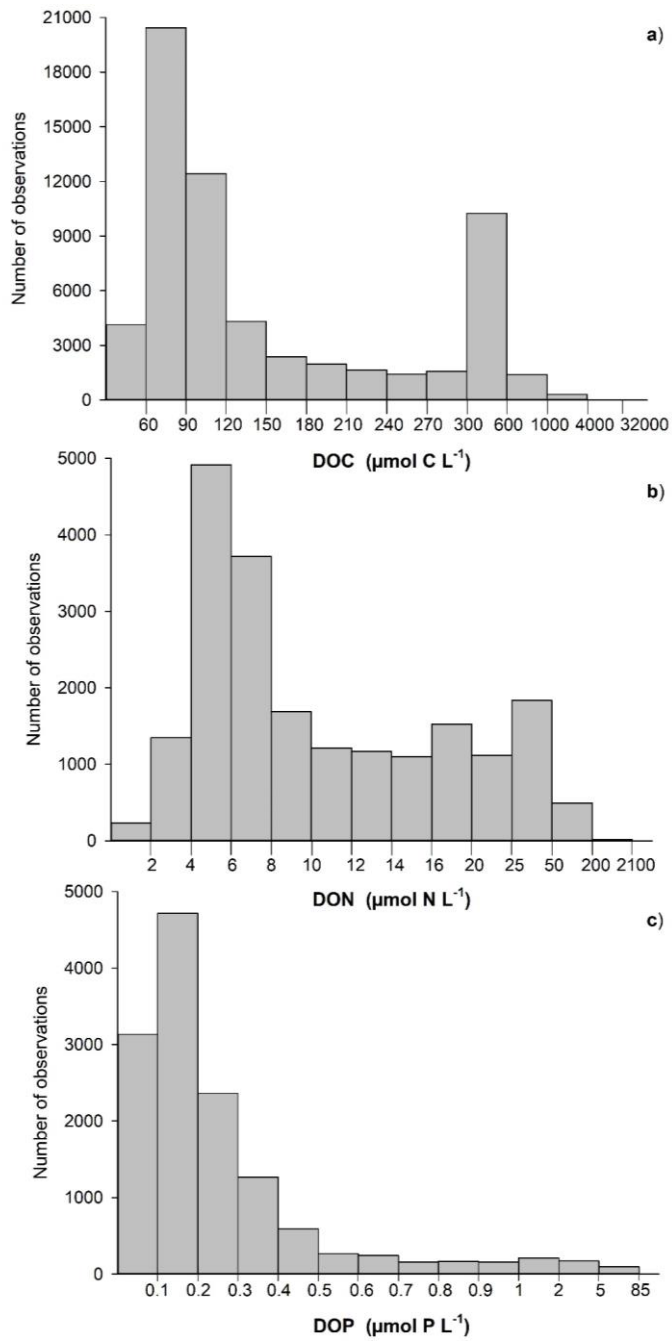

821

822 **Figure 24.**

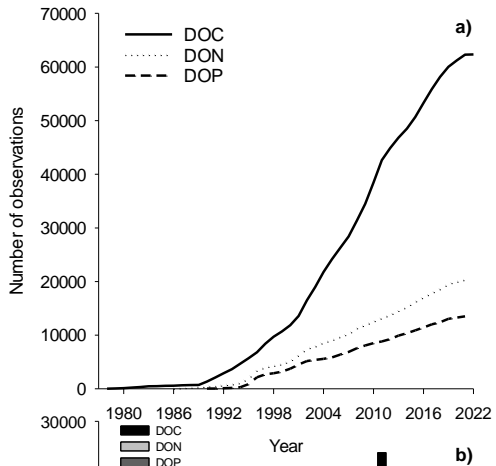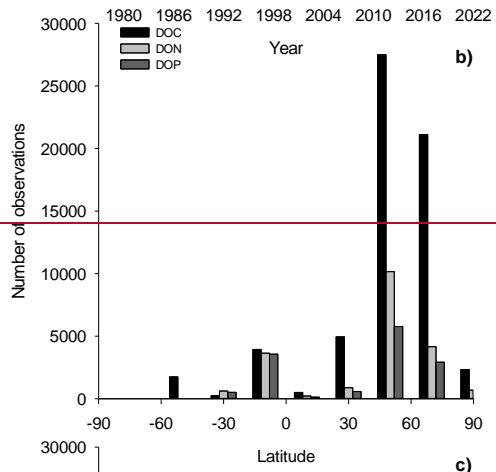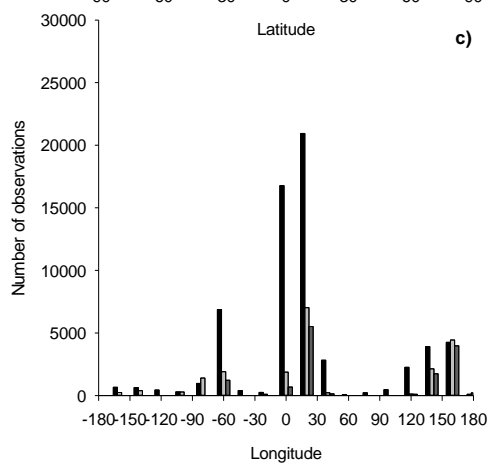

823 -  
824

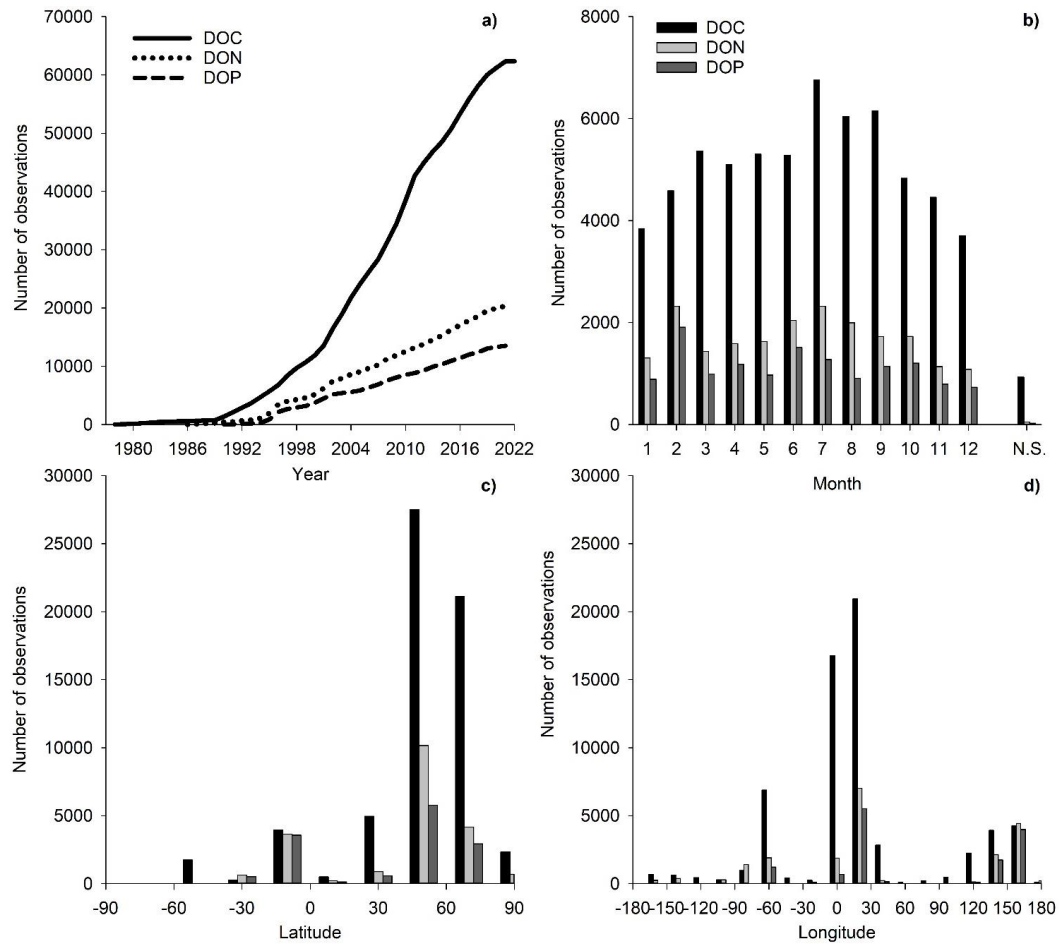

825

826 **Figure 23.**

■ Africa 
 ■ Antarctica 
 ■ Asia 
 ■ Europe 
 ■ Oceania 
 ■ South America 
 ■ North America

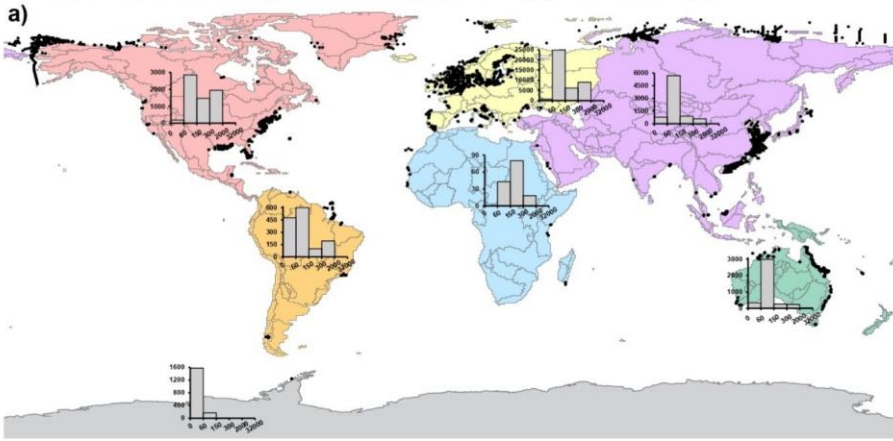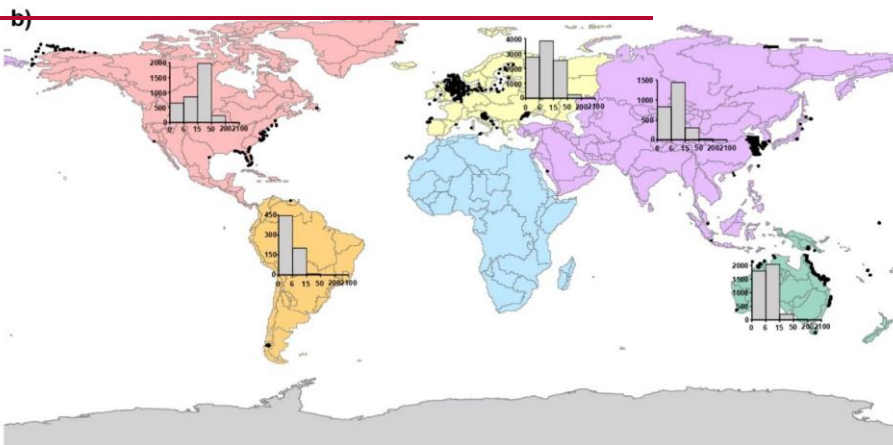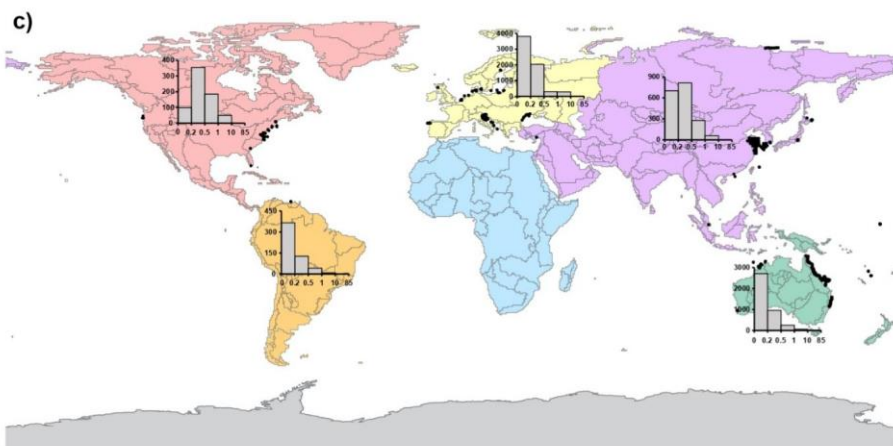

827  
828

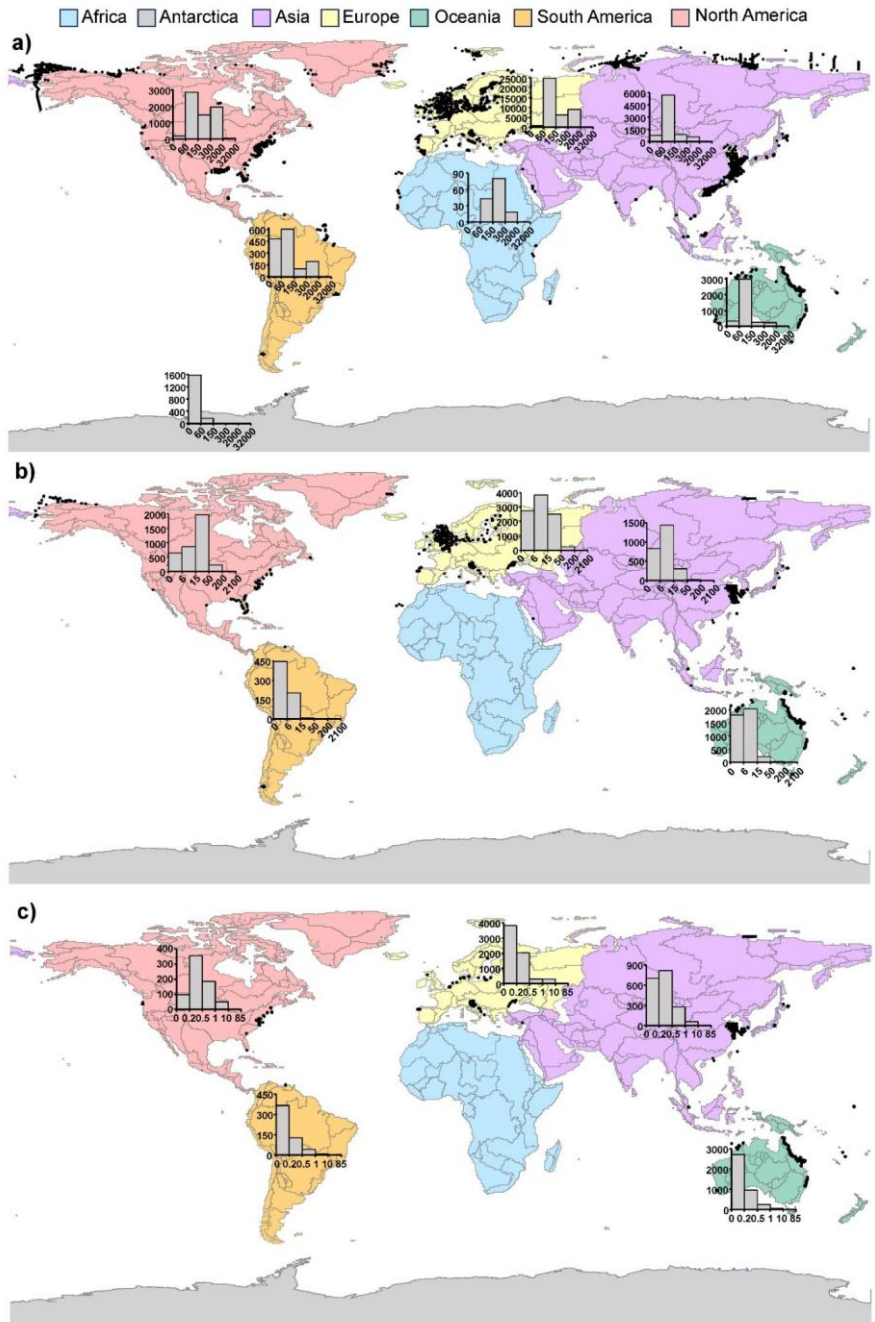

829

830 Figure 43.
